# Supplementary material for: Genetically predicted serum urate and the risk of all-cause and site-specific cancer: A Mendelian randomization study
Source: Research Square preprint supplement (doi:10.21203/rs.3.rs-5007746/v1), 2024-10-08
Supplement: Supplementary file 1 [file bcff4f28b3deebc26c3429fb.docx]

**Supplementary texts**

**Text S1: Genotyping information**

In the MDCS-MPP cohort, DNA genotyping was done via a MALDI-TOF mass spectrometer (Sequenom MassArray, Sequenom, San Diego, CA, USA) using Sequenom reagents and protocols. For a candidate SNP that failed genotyping, a proxy SN P, identified using SNAP version 2.2.2, was used. For the SNPs failing the Sequenom genotyping, TaqMan, KASPar allelic discrimination on an ABI 7900HT (Applied Biosystems, Life Technologies, Carlsbad, CA, USA) genotyping was used as per manufacturer’s instructions. Complete details of genotyping in MDCS-MPP cohort are provided in Teleka et al. (2020) [1].

In the UK-Biobank cohort, the DNA genotyping was performed on two similar purpose-designed arrays: UK BiLEVE Axiom array (~50,000 participants) and UK Biobank Axiom array (~450,000 participants). These arrays share 95% marker content [2]. The resulting dataset of 489,212 samples at 812,428 unique markers was quality controlled and imputed to give results for ~96M genotypes.

**Text S2: MR-Egger and Weighted median methods**

We estimated the intercept and slope of MR-Egger regression, which represent the average horizontal pleiotropy and a pleiotropy-adjusted MR estimate, respectively. An intercept value for this regression that does not include the null (p < 0.05) was considered indicative of horizontal pleiotropy. MR-Egger assumes that the strength of the instruments is not correlated to any pleiotropic effect that they have. Additionally, the weighted median estimator was performed. This is the weighted median effect of all the MR estimates produced by individual instruments, with weights equal to the inverse of the standard error. It is valid when more than half the information from the analysis comes from valid instruments.

**Supplementary tables**

**Table S1: Number of controls and cancer cases in MDCS-MPP and UK Biobank cohorts**

| Sr # | Cancer type | MDCS-MPP | | | | UK Biobank | | |
| --- | --- | --- | --- | --- | --- | --- | --- | --- |
|  |  | **Follow-up (years)** | **All total** | **Case** | **Control** | **All total** | **Case** | **Control** |
| 1 | Bladder | 25.81 | 12454 | 516 | 11938 | 333000 | 2245 | 330755 |
| 2 | Colorectal | 24.98 | 12729 | 791 | 11938 | 335243 | 4488 | 330755 |
| 3 | Brain | 17.58 | 12054 | 116 | 11938 | 331344 | 589 | 330755 |
| 4 | Gastric | 25.06 | 12114 | 176 | 11938 | 331955 | 1200 | 330755 |
| 5 | Hepatic | 27.55 | 11987 | 49 | 11938 | 331241 | 486 | 330755 |
| 6 | Renal | 24.35 | 12115 | 177 | 11938 | 331994 | 1239 | 330755 |
| 7 | Lung | 25.31 | 12483 | 545 | 11938 | 333345 | 2590 | 330755 |
| 8 | Lymphatic and hematopoietic | 24.64 | 12399 | 461 | 11938 | 340332 | 9577 | 330755 |
| 9 | Pancreatic | 24.47 | 12060 | 122 | 11938 | 331590 | 835 | 330755 |
| 10 | Skin | 21.32 | 12331 | 393 | 11938 | 333019 | 2264 | 330755 |
| 11 | Breast | 17.4 | 5364 | 729 | 4635 | 189222 | 10274 | 178948 |
| 12 | Gynecological | 15.36 | 5000 | 368 | 4635 | 181590 | 2642 | 178948 |
| 13 | Prostate | 26.2 | 8827 | 1521 | 7306 | 158281 | 6474 | 151807 |
| 14 | All-cause | 21.19 | 17597 | 5659 | 11938 | 367570 | 36815 | 330755 |

MDCS-MPP: Malmö Diet Cancer Study and Malmö Preventive Project

**Table S2: Basic characteristics of individuals in MDCS-MPP cohort (n = 17597)**

| Characteristics | N (%) | Mean ± SD |
| --- | --- | --- |
| Sex, male | 10639 (60.4) | - |
| Age (all) | 17597 (100) | 46.53 ± 6.6 |
| Age (Males) | 10639 (60.4) | 44.11 ± 5.2 |
| Age (Females) | 6958 (39.5) | 50.22 ± 6.8 |
| BMI (kg/m2) | 17590 (99.9) | 24.43 ± 3.5 |
| Serum creatinine (µmol/L) | 17530 (99.6) | 86.93 ± 18.2 |
| Serum urate (µmol/L) | 17544 (99.7) | 294.89 ± 68.2 |
| Serum urate (mg/dL) | 17544 (99.7) | 4.96 ± 1.15 |
| Serum urate (Males) (µmol/L) | 10619 (60.3) | 321.69 ± 62.0 |
| Serum urate (Females) (µmol/L) | 6928 (39.3) | 253.84 ± 55.6 |

MDCS-MPP: Malmö Diet Cancer Study and Malmö Preventive Project, BMI: body mass index, SD: standard deviation

**Table S3: ICD codes for cancer diagnosis that were matched between the MDCS-MPP and UK Biobank cohort prior to the analyses**

| Sr # | Cancer type | ICD-9 codes | ICD-10 codes |
| --- | --- | --- | --- |
| 1 | Bladder Cancer | 188.X | C67.X |
| 2 | Colorectal Cancer | 153.X, 154.0, 154.1, 154.2, 154.8, 159.0, 159.9 | C18.X, C20.X |
| 3 | Brain Tumor | 191.X | C71.X |
| 4 | Gastric Cancer | 150.X, 151.X | C15.X, C16.X |
| 5 | Hepatic Cancer | 155.X | C22.X |
| 6 | Renal Cancer | 189.X | C64.X, C65.X, C66.X, C68.X |
| 7 | Lung Cancer | 162.X | C34.X |
| 8 | Lymphatic and Hematopoietic Cancer | 200.X, 201.X, 202.X, 203.X, 204.X, 205.X, 206.X, 207.X, 208.X, 209.X | C77.X, C81.X, C82.X, C83.X, C84.X, C85.X, C86.X, C88.X, C90.X, C91.X, C92.X, C93.X, C94.X, C95.X, C96.X |
| 9 | Pancreatic Cancer | 157.X | C25.X |
| 10 | Skin Cancer | 172.X | C43.X |
| 11 | Breast Cancer | 174.X | C50.X |
| 12 | Gynecological Cancers | 179.9, 180.X, 181.9, 182.0, 182.1, 183.X, 184.9, 195.3 | C51.X, C52.X, C53.X, C54.X, C55.X, C56.X, C57.X, C58.X |
| 13 | Prostate Cancer | 185.X | C61.X |
| 14 | All-cause cancer | 150.X, 151.X, 153.X, 154.0, 154.1, 154.2, 154.8, 155.X, 157.X, 159.0, 159.9, 162.X, 172.X, 174.X, 179.9, 180.X, 181.9, 182.0, 182.1, 183.X, 184.9, 185.X, 188.X, 189.X, 191.X, 195.3, 200.X, 201.X, 202.X, 203.X, 204.X, 205.X, 206.X, 207.X, 208.X, 209.X | C15.X, C16.X, C18.X, C20.X, C22.X, C25.X, C34.X, C43.X, C50.X, C51.X, C52.X, C53.X, C54.X, C55.X, C56.X, C57.X, C58.X, C61.X, C64.X, C65.X, C66.X, C67.X, C68.X, C71.X, C77.X, C81.X, C82.X, C83.X, C84.X, C85.X, C86.X, C88.X, C90.X, C91.X, C92.X, C93.X, C94.X, C95.X, C96.X |

ICD: International Classification of Diseases, MDCS-MPP: Malmö Diet Cancer Study and Malmö Preventive Project

**Table S4: List of 26 serum urate SNPs from Köttgen et al. [3] used as instruments in MR**

| Sr # | SNP | Chr | Closest gene | EA | OA | EAF | GX | SE-GX | *p* | N | MAF | R2 | F-statistics |
| --- | --- | --- | --- | --- | --- | --- | --- | --- | --- | --- | --- | --- | --- |
| 1 | *rs11264341* | 1 | *TRIM46* | T | C | 0.43 | -0.05 | 0.006 | 6.2 E-19 | 110347 | 0.43 | 0.00062893 | 69.3988818 |
| 2 | *rs1471633* | 1 | *PDZK1* | A | C | 0.46 | 0.059 | 0.005 | 1.2 E-29 | 110347 | 0.46 | 0.00126025 | 139.060742 |
| 3 | *rs1260326* | 2 | *GCKR* | T | C | 0.41 | 0.074 | 0.005 | 1.2 E-44 | 110347 | 0.41 | 0.00198108 | 218.600121 |
| 4 | *rs17050272* | 2 | *INHBB* | A | G | 0.43 | 0.035 | 0.006 | 1.6 E-10 | 110347 | 0.43 | 0.00030828 | 34.016363 |
| 5 | *rs6770152* | 3 | *SFMBT1* | T | G | 0.58 | -0.044 | 0.005 | 2.6 E-16 | 110347 | 0.42 | 0.00070129 | 77.3835879 |
| 6 | *rs12498742* | 4 | *SLC2A9* | A | G | 0.77 | 0.373 | 0.006 | < 1 E-700 | 110347 | 0.23 | 0.03383799 | 3733.81943 |
| 7 | *rs2231142* | 4 | *ABCG2* | T | G | 0.11 | 0.217 | 0.009 | 1.0 E-134 | 110347 | 0.11 | 0.00524073 | 578.28328 |
| 8 | *rs17632159* | 5 | *TMEM171* | C | G | 0.31 | -0.039 | 0.006 | 3.5 E-11 | 110347 | 0.31 | 0.00038274 | 42.2326812 |
| 9 | *rs1165151* | 6 | *SLC17A1* | T | G | 0.47 | -0.091 | 0.005 | 7.0 E-70 | 110347 | 0.47 | 0.00299282 | 330.23968 |
| 10 | *rs675209* | 6 | *RREB1* | T | C | 0.27 | 0.061 | 0.006 | 1.3 E-23 | 110347 | 0.27 | 0.00093582 | 103.261577 |
| 11 | *rs729761* | 6 | *VEGFA* | T | G | 0.3 | -0.047 | 0.006 | 8.0 E-16 | 110347 | 0.3 | 0.00055577 | 61.3253415 |
| 12 | *rs10480300* | 7 | *PRKAG2* | T | C | 0.28 | 0.035 | 0.006 | 4.1 E-9 | 110347 | 0.28 | 0.00030828 | 34.016363 |
| 13 | *rs1178977* | 7 | *BAZ1B* | A | G | 0.81 | 0.047 | 0.007 | 1.2 E-12 | 110347 | 0.19 | 0.00040838 | 45.0619972 |
| 14 | *rs17786744* | 8 | *STC1* | A | G | 0.58 | -0.029 | 0.005 | 1.4 E-8 | 110347 | 0.42 | 0.00030476 | 33.6288335 |
| 15 | *rs2941484* | 8 | *HNF4G* | T | C | 0.44 | 0.044 | 0.005 | 4.4 E-17 | 110347 | 0.44 | 0.00070129 | 77.3835879 |
| 16 | *rs10821905* | 10 | *A1CF* | A | G | 0.18 | 0.057 | 0.007 | 7.4 E-17 | 110347 | 0.18 | 0.00060053 | 66.2645023 |
| 17 | *rs1171614* | 10 | *SLC16A9* | T | C | 0.22 | -0.079 | 0.007 | 2.3 E-28 | 110347 | 0.22 | 0.00115291 | 127.217045 |
| 18 | *rs2078267* | 11 | *SLC22A11* | T | C | 0.51 | -0.073 | 0.006 | 9.4 E-38 | 110347 | 0.49 | 0.00133968 | 147.825449 |
| 19 | *rs478607* | 11 | *NRXN2* | A | G | 0.84 | -0.047 | 0.007 | 4.4 E-11 | 110347 | 0.16 | 0.00040838 | 45.0619972 |
| 20 | *rs3741414* | 12 | *INHBC* | T | C | 0.24 | -0.072 | 0.007 | 2.2 E-25 | 110347 | 0.24 | 0.00095784 | 105.691709 |
| 21 | *rs653178* | 12 | *ATXN2* | T | C | 0.51 | -0.035 | 0.005 | 7.2 E-12 | 110347 | 0.49 | 0.00044386 | 48.9769195 |
| 22 | *rs1394125* | 15 | *UBE2Q2* | A | G | 0.34 | 0.043 | 0.006 | 2.5 E-13 | 110347 | 0.34 | 0.00046523 | 51.3358205 |
| 23 | *rs6598541* | 15 | *IGF1R* | A | G | 0.36 | 0.043 | 0.006 | 4.8 E-15 | 110347 | 0.36 | 0.00046523 | 51.3358205 |
| 24 | *rs7188445* | 16 | *MAF* | A | G | 0.33 | -0.032 | 0.005 | 1.6 E-9 | 110347 | 0.33 | 0.00037105 | 40.9436884 |
| 25 | *rs7193778* | 16 | *NFAT5* | T | C | 0.86 | -0.046 | 0.008 | 8.2 E-10 | 110347 | 0.14 | 0.00029953 | 33.0516981 |
| 26 | *rs7224610* | 17 | *HLF* | A | C | 0.58 | -0.042 | 0.005 | 5.4 E-17 | 110347 | 0.42 | 0.00063903 | 70.512993 |

SNP: SNP id number; Chr: chromosome; EA: effect allele; OA: other allele; EAF: effect allele frequency; G: genetic variant or SNP, X: exposure (serum urate in this case); GX: beta for the variant/SNP-urate association; SE-GX: standard error of GX; *p*: p-value of GX; N: sample size of the Köttgen et al. (2013) study [3]. MAF: minor allele frequency; R2: % of variance in serum urate levels explained by each SNP; F-statistic: a measure of an instrument's strength. R2 and F-statistics were calculated by methods applied by [4] and [5], respectively.

**Table S5: List of 7 SNPs exclusively associated with serum urate/gout from Köttgen et al. [3] after removing pleiotropic SNPs**

| Sr # | SNP | Chr | Closest gene | EA | OA | EAF | GX | SE-GX | *p* | N | MAF | R2 | F-statistics |
| --- | --- | --- | --- | --- | --- | --- | --- | --- | --- | --- | --- | --- | --- |
| 1 | *rs1471633* | 1 | *PDZK1* | A | C | 0.46 | 0.059 | 0.005 | 1.2 E-29 | 110347 | 0.46 | 0.00126025 | 139.060742 |
| 2 | *rs12498742* | 4 | *SLC2A9* | A | G | 0.77 | 0.373 | 0.006 | < 1 E-700 | 110347 | 0.23 | 0.03383799 | 3733.81943 |
| 3 | *rs2231142* | 4 | *ABCG2* | T | G | 0.11 | 0.217 | 0.009 | 1.0 E-134 | 110347 | 0.11 | 0.00524073 | 578.28328 |
| 4 | *rs17632159* | 5 | *TMEM171* | C | G | 0.31 | -0.039 | 0.006 | 3.5 E-11 | 110347 | 0.31 | 0.00038274 | 42.2326812 |
| 5 | *rs2941484* | 8 | *HNF4G* | T | C | 0.44 | 0.044 | 0.005 | 4.4 E-17 | 110347 | 0.44 | 0.00070129 | 77.3835879 |
| 6 | *rs2078267* | 11 | *SLC22A11* | T | C | 0.51 | -0.073 | 0.006 | 9.4 E-38 | 110347 | 0.49 | 0.00133968 | 147.825449 |
| 7 | *rs7224610* | 17 | *HLF* | A | C | 0.58 | -0.042 | 0.005 | 5.4 E-17 | 110347 | 0.42 | 0.00063903 | 70.512993 |

SNP: SNP number; Chr: chromosome; EA: effect allele; OA: other allele; EAF: effect allele frequency; G: genetic variant or SNP, X: exposure (serum urate in this case); GX: beta for the SNP-urate association; SE-GX: standard error of GX; p: p-value of GX; N: sample size of the Köttgen et al. (2013) study [3]. MAF: minor allele frequency; R2: % of variance in serum urate levels explained by each SNP; F-statistic: a measure of an instrument's strength. R2 and F-statistics were calculated by methods applied by [4] and [5], respectively.

Note: The pleiotropic SNPs were excluded using the information at Phenoscanner [6].

**Table S6: List of 26 SNPs showing SNP-urate association results in MDCS-MPP cohort**

| Sr # | SNPs | Chr | Closest gene | EA | OA | EAF | GX^ | SE-GX | *p* | N* |
| --- | --- | --- | --- | --- | --- | --- | --- | --- | --- | --- |
| 1 | *rs11264341* | 1 | *TRIM46* | T | C | 0.43 | -0.026 | 0.013 | 5.51E-02 | 11938 |
| 2 | *rs1471633* | 1 | *PDZK1* | A | C | 0.49 | 0.077 | 0.021 | 2.34E-04 | 11938 |
| 3 | *rs1260326* | 2 | *GCKR* | T | C | 0.37 | 0.047 | 0.014 | 6.19E-04 | 11938 |
| 4 | *rs17050272* | 2 | *INHBB* | A | G | 0.43 | 0.044 | 0.014 | 1.30E-03 | 11938 |
| 5 | *rs6770152* | 3 | *SFMBT1* | T | G | 0.59 | -0.046 | 0.014 | 8.11E-04 | 11938 |
| 6 | *rs12498742* | 4 | *SLC2A9* | A | G | 0.77 | 0.297 | 0.016 | 4.09E-78 | 11938 |
| 7 | *rs2231142* | 4 | *ABCG2* | T | G | 0.09 | 0.219 | 0.022 | 7.35E-23 | 11938 |
| 8 | *rs17632159* | 5 | *TMEM171* | C | G | 0.29 | -0.047 | 0.015 | 2.17E-03 | 11938 |
| 9 | *rs1165151* | 6 | *SLC17A1* | T | G | 0.47 | -0.074 | 0.013 | 2.74E-08 | 11938 |
| 10 | *rs675209* | 6 | *RREB1* | T | C | 0.26 | 0.036 | 0.015 | 1.71E-02 | 11938 |
| 11 | *rs729761* | 6 | *VEGFA* | T | G | 0.28 | -0.013 | 0.015 | 3.81E-01 | 11938 |
| 12 | *rs10480300* | 7 | *PRKAG2* | T | C | 0.26 | 0.012 | 0.015 | 4.19E-01 | 11938 |
| 13 | *rs1178977* | 7 | *BAZ1B* | A | G | 0.81 | 0.023 | 0.017 | 1.71E-01 | 11938 |
| 14 | *rs17786744* | 8 | *STC1* | A | G | 0.55 | -0.009 | 0.013 | 4.68E-01 | 11938 |
| 15 | *rs2941484* | 8 | *HNF4G* | T | C | 0.45 | 0.052 | 0.013 | 1.02E-04 | 11938 |
| 16 | *rs10821905* | 10 | *A1CF* | A | G | 0.18 | 0.068 | 0.017 | 8.31E-05 | 11938 |
| 17 | *rs1171614* | 10 | *SLC16A9* | T | C | 0.22 | -0.065 | 0.016 | 4.71E-05 | 11938 |
| 18 | *rs2078267* | 11 | *SLC22A11* | T | C | 0.51 | -0.067 | 0.013 | 6.39E-07 | 11938 |
| 19 | *rs478607* | 11 | *NRXN2* | A | G | 0.83 | -0.069 | 0.018 | 1.17E-04 | 11938 |
| 20 | *rs3741414* | 12 | *INHBC* | T | C | 0.26 | -0.093 | 0.015 | 6.80E-10 | 11938 |
| 21 | *rs653178* | 12 | *ATXN2* | T | C | 0.51 | -0.037 | 0.013 | 5.27E-03 | 11938 |
| 22 | *rs1394125* | 15 | *UBE2Q2* | A | G | 0.32 | 0.068 | 0.014 | 2.43E-06 | 11938 |
| 23 | *rs6598541* | 15 | *IGF1R* | A | G | 0.36 | 0.042 | 0.014 | 2.27E-03 | 11938 |
| 24 | *rs7188445* | 16 | *MAF* | A | G | 0.35 | -0.017 | 0.014 | 2.33E-01 | 11938 |
| 25 | *rs7193778* | 16 | *NFAT5* | T | C | 0.85 | -0.001 | 0.019 | 9.61E-01 | 11938 |
| 26 | *rs7224610* | 17 | *HLF* | A | C | 0.6 | -0.029 | 0.014 | 3.34E-02 | 11938 |

MDCS-MPP: Malmö Diet Cancer Study and Malmö Preventive Project; SNP: SNP number; Chr: chromosome; EA: effect allele; OA: other allele; EAF: effect allele frequency; G: genetic variant or SNP, X: exposure (serum urate in this case); GX: beta for the SNP-urate association; SE-GX: standard error of GX; p: p-value of GX; N: total number of controls used for GX calculations in MDC-MPP cohort

^Estimates are adjusted for age and sex

*SNP-urate association analyses were done in controls only

**Table S7: List of 7 SNPs associated only with serum urate/gout in [3], showing SNP-urate association in MDCS-MPP cohort**

| Sr # | SNPs | Chr | Closest gene | EA | OA | EAF | GX^ | SE-GX | *p* | N* |
| --- | --- | --- | --- | --- | --- | --- | --- | --- | --- | --- |
| 1 | *rs1471633* | 1 | *PDZK1* | A | C | 0.49 | 0.077 | 0.021 | 2.34E-04 | 11938 |
| 2 | *rs12498742* | 4 | *SLC2A9* | A | G | 0.77 | 0.297 | 0.016 | 4.09E-78 | 11938 |
| 3 | *rs2231142* | 4 | *ABCG2* | T | G | 0.09 | 0.219 | 0.022 | 7.35E-23 | 11938 |
| 4 | *rs17632159* | 5 | *TMEM171* | C | G | 0.29 | -0.047 | 0.015 | 2.17E-03 | 11938 |
| 5 | *rs2941484* | 8 | *HNF4G* | T | C | 0.45 | 0.052 | 0.013 | 1.02E-04 | 11938 |
| 6 | *rs2078267* | 11 | *SLC22A11* | T | C | 0.51 | -0.067 | 0.013 | 6.39E-07 | 11938 |
| 7 | *rs7224610* | 17 | *HLF* | A | C | 0.6 | -0.029 | 0.014 | 3.34E-02 | 11938 |

MDCS-MPP: Malmö Diet Cancer Study and Malmö Preventive Project; SNP: SNP number; Chr: chromosome; EA: effect allele; OA: other allele; EAF: effect allele frequency; G: genetic variant or SNP, X: exposure (serum urate in this case); GX: beta for the SNP-urate association; SE-GX: standard error of GX; p: p-value of GX; N: total number of controls used for GX calculations in MDC-MPP cohort

^Estimates are adjusted for age and sex

*SNP-urate association analyses were done in controls only

**Table S8: The association estimates of the 26 SNPs for urate with bladder cancer in the MDCS-MPP cohort**

|  | SNP | Chr | EA | OA | GY' | SE-GY | *p* |
| --- | --- | --- | --- | --- | --- | --- | --- |
| 1 | *rs11264341* | 1 | T | C | -0.02305198 | 0.064210493 | 0.71959028 |
| 2 | *rs1471633* | 1 | A | C | -0.078263057 | 0.098291456 | 0.4258957 |
| 3 | *rs1260326* | 2 | T | C | 0.044831169 | 0.065607922 | 0.49440501 |
| 4 | *rs17050272* | 2 | A | G | 0.064238688 | 0.064172188 | 0.31680927 |
| 5 | *rs6770152* | 3 | T | G | 0.047540121 | 0.065280459 | 0.46646406 |
| 6 | *rs12498742* | 4 | A | G | -0.047748339 | 0.075420115 | 0.52666952 |
| 7 | *rs2231142* | 4 | T | G | 0.001915166 | 0.107030172 | 0.98572365 |
| 8 | *rs17632159* | 5 | C | G | 8.72E-05 | 0.07379044 | 0.9990571 |
| 9 | *rs1165151* | 6 | T | G | -0.025805961 | 0.063734082 | 0.68555066 |
| 10 | *rs675209* | 6 | T | C | -0.022577032 | 0.072612367 | 0.75585731 |
| 11 | *rs729761* | 6 | T | G | -0.161575444 | 0.074295355 | 0.02964722 |
| 12 | *rs10480300* | 7 | T | C | 0.058083721 | 0.072111338 | 0.4205469 |
| 13 | *rs1178977* | 7 | A | G | 0.080149586 | 0.080961175 | 0.32218606 |
| 14 | *rs17786744* | 8 | A | G | 0.061448671 | 0.064145892 | 0.33808708 |
| 15 | *rs2941484* | 8 | T | C | 0.06435361 | 0.063914677 | 0.31399846 |
| 16 | *rs10821905* | 10 | A | G | -0.090582768 | 0.084865448 | 0.28580514 |
| 17 | *rs1171614* | 10 | T | C | 0.01006516 | 0.076733061 | 0.89563995 |
| 18 | *rs2078267* | 11 | T | C | 0.064311557 | 0.06430449 | 0.31725733 |
| 19 | *rs478607* | 11 | A | G | -0.092688774 | 0.083895838 | 0.26924289 |
| 20 | *rs3741414* | 12 | T | C | 0.076578281 | 0.071226271 | 0.28231163 |
| 21 | *rs653178* | 12 | T | C | -0.103307557 | 0.063597317 | 0.10429022 |
| 22 | *rs1394125* | 15 | A | G | 0.129435658 | 0.067422869 | 0.05488835 |
| 23 | *rs6598541* | 15 | A | G | 0.030837273 | 0.065971348 | 0.64018917 |
| 24 | *rs7188445* | 16 | A | G | -0.017123031 | 0.067541388 | 0.79986712 |
| 25 | *rs7193778* | 16 | T | C | -0.05743491 | 0.089029467 | 0.51884782 |
| 26 | *rs7224610* | 17 | A | C | 0.029193889 | 0.065328924 | 0.65496502 |

MDCS-MPP: Malmö Diet Cancer Study and Malmö Preventive Project, SNP: SNP number; Chr: chromosome; EA: effect allele; OA: other allele; G: genetic variant or SNP, Y: outcome (cancer in this case); GY: beta for the SNP-cancer association; SE-GY: standard error of GY; p: p-value of GY.

'Estimates are adjusted for age and sex

SNP-cancer association analyses were done after excluding controls.

**Table S9: The association estimates of the 26 SNPs for urate with colorectal cancer in the MDCS-MPP cohort**

|  | SNP | Chr | EA | OA | GY' | SE-GY | *p* |
| --- | --- | --- | --- | --- | --- | --- | --- |
| 1 | *rs11264341* | 1 | T | C | -0.032808488 | 0.052082389 | 0.52873751 |
| 2 | *rs1471633* | 1 | A | C | -0.060711117 | 0.081821775 | 0.45809208 |
| 3 | *rs1260326* | 2 | T | C | 0.008846459 | 0.053188154 | 0.86790209 |
| 4 | *rs17050272* | 2 | A | G | -0.019941477 | 0.052344096 | 0.70322626 |
| 5 | *rs6770152* | 3 | T | G | 0.006181506 | 0.052604039 | 0.90645583 |
| 6 | *rs12498742* | 4 | A | G | 0.026811748 | 0.062171002 | 0.66628071 |
| 7 | *rs2231142* | 4 | T | G | -0.059911209 | 0.088186265 | 0.49690269 |
| 8 | *rs17632159* | 5 | C | G | 0.063039479 | 0.059081904 | 0.28597881 |
| 9 | *rs1165151* | 6 | T | G | -0.041308053 | 0.051595979 | 0.42335974 |
| 10 | *rs675209* | 6 | T | C | -0.107988067 | 0.060068125 | 0.07221506 |
| 11 | *rs729761* | 6 | T | G | 0.033282834 | 0.057381509 | 0.5618963 |
| 12 | *rs10480300* | 7 | T | C | -0.007338988 | 0.058939467 | 0.90090564 |
| 13 | *rs1178977* | 7 | A | G | 0.06039429 | 0.065152605 | 0.35394386 |
| 14 | *rs17786744* | 8 | A | G | 0.036468455 | 0.051806712 | 0.48147448 |
| 15 | *rs2941484* | 8 | T | C | 0.038178296 | 0.05190429 | 0.46200348 |
| 16 | *rs10821905* | 10 | A | G | -0.13494771 | 0.069808444 | 0.0532221 |
| 17 | *rs1171614* | 10 | T | C | -0.010592431 | 0.062238343 | 0.86485962 |
| 18 | *rs2078267* | 11 | T | C | 0.016614607 | 0.051782535 | 0.74832142 |
| 19 | *rs478607* | 11 | A | G | -0.083177759 | 0.068125173 | 0.22210312 |
| 20 | *rs3741414* | 12 | T | C | 0.042341794 | 0.057965643 | 0.46510683 |
| 21 | *rs653178* | 12 | T | C | 0.024198901 | 0.05138335 | 0.63767766 |
| 22 | *rs1394125* | 15 | A | G | -0.074324044 | 0.056221516 | 0.18617289 |
| 23 | *rs6598541* | 15 | A | G | 0.137334246 | 0.052642187 | 0.00908537 |
| 24 | *rs7188445* | 16 | A | G | -0.066434091 | 0.054833425 | 0.2256801 |
| 25 | *rs7193778* | 16 | T | C | -0.033118736 | 0.072424146 | 0.64746363 |
| 26 | *rs7224610* | 17 | A | C | -0.008176239 | 0.052560129 | 0.87638008 |

MDCS-MPP: Malmö Diet Cancer Study and Malmö Preventive Project, SNP: SNP number; Chr: chromosome; EA: effect allele; OA: other allele; G: genetic variant or SNP, Y: outcome (cancer in this case); GY: beta for the SNP-cancer association; SE-GY: standard error of GY; p: p-value of GY.

'Estimates are adjusted for age and sex.

SNP-cancer association analyses were done after excluding controls.

**Table S10: The association estimates of the 26 SNPs for urate with brain tumor in the MDCS-MPP cohort**

|  | SNP | Chr | EA | OA | GY' | SE-GY | *p* |
| --- | --- | --- | --- | --- | --- | --- | --- |
| 1 | *rs11264341* | 1 | T | C | 0.053631885 | 0.132564788 | 0.68579279 |
| 2 | *rs1471633* | 1 | A | C | -0.112060176 | 0.209527793 | 0.59277261 |
| 3 | *rs1260326* | 2 | T | C | -0.011391387 | 0.13648614 | 0.9334843 |
| 4 | *rs17050272* | 2 | A | G | -0.05640391 | 0.134566728 | 0.67510506 |
| 5 | *rs6770152* | 3 | T | G | 0.309332191 | 0.140016482 | 0.02715687 |
| 6 | *rs12498742* | 4 | A | G | -0.162749864 | 0.151545213 | 0.28285135 |
| 7 | *rs2231142* | 4 | T | G | -0.6085781 | 0.28623843 | 0.03349302 |
| 8 | *rs17632159* | 5 | C | G | 0.147258556 | 0.148484402 | 0.32132228 |
| 9 | *rs1165151* | 6 | T | G | -0.098961815 | 0.132539434 | 0.45526918 |
| 10 | *rs675209* | 6 | T | C | -0.028697351 | 0.151152032 | 0.84942078 |
| 11 | *rs729761* | 6 | T | G | 0.023518676 | 0.146920655 | 0.87282011 |
| 12 | *rs10480300* | 7 | T | C | 0.107934099 | 0.147147148 | 0.46324662 |
| 13 | *rs1178977* | 7 | A | G | -0.122412912 | 0.158239666 | 0.43917221 |
| 14 | *rs17786744* | 8 | A | G | -0.007685559 | 0.132198626 | 0.95363994 |
| 15 | *rs2941484* | 8 | T | C | 0.043857978 | 0.133265314 | 0.74207805 |
| 16 | *rs10821905* | 10 | A | G | 0.051395711 | 0.16905754 | 0.76111789 |
| 17 | *rs1171614* | 10 | T | C | 0.116941335 | 0.153702725 | 0.44675981 |
| 18 | *rs2078267* | 11 | T | C | 0.372791762 | 0.135852167 | 0.00606773 |
| 19 | *rs478607* | 11 | A | G | -0.161353535 | 0.169544902 | 0.34125618 |
| 20 | *rs3741414* | 12 | T | C | -0.050114985 | 0.15105744 | 0.74006965 |
| 21 | *rs653178* | 12 | T | C | 0.107830034 | 0.131867531 | 0.41352005 |
| 22 | *rs1394125* | 15 | A | G | 0.184748135 | 0.138054251 | 0.18082196 |
| 23 | *rs6598541* | 15 | A | G | -0.052055795 | 0.137714288 | 0.7054317 |
| 24 | *rs7188445* | 16 | A | G | -0.255127397 | 0.145292636 | 0.07909601 |
| 25 | *rs7193778* | 16 | T | C | -0.528057457 | 0.159472686 | 0.00092873 |
| 26 | *rs7224610* | 17 | A | C | -0.192433731 | 0.132040096 | 0.14500914 |

MDCS-MPP: Malmö Diet Cancer Study and Malmö Preventive Project, SNP: SNP number; Chr: chromosome; EA: effect allele; OA: other allele; G: genetic variant or SNP, Y: outcome (cancer in this case); GY: beta for the SNP-cancer association; SE-GY: standard error of GY; p: p-value of GY.

'Estimates are adjusted for age and sex.

SNP-cancer association analyses were done after excluding controls.

**Table S11: The association estimates of the 26 SNPs for urate with breast cancer in the MDCS-MPP cohort**

|  | SNP | Chr | EA | OA | GY' | SE-GY | *p* |
| --- | --- | --- | --- | --- | --- | --- | --- |
| 1 | *rs11264341* | 1 | T | C | -0.008703187 | 0.054143864 | 0.87229669 |
| 2 | *rs1471633* | 1 | A | C | 0.038890983 | 0.092256814 | 0.67335253 |
| 3 | *rs1260326* | 2 | T | C | 0.047005088 | 0.054837512 | 0.39135076 |
| 4 | *rs17050272* | 2 | A | G | 0.046888391 | 0.054342569 | 0.38823103 |
| 5 | *rs6770152* | 3 | T | G | 0.022217522 | 0.054590517 | 0.684019 |
| 6 | *rs12498742* | 4 | A | G | -0.001799215 | 0.06404885 | 0.97758934 |
| 7 | *rs2231142* | 4 | T | G | -0.115803071 | 0.090933526 | 0.20284369 |
| 8 | *rs17632159* | 5 | C | G | -0.020176284 | 0.062540395 | 0.74698907 |
| 9 | *rs1165151* | 6 | T | G | 0.038147358 | 0.054055373 | 0.48036919 |
| 10 | *rs675209* | 6 | T | C | 0.11614144 | 0.060011582 | 0.0529514 |
| 11 | *rs729761* | 6 | T | G | -0.059539637 | 0.060834947 | 0.32772438 |
| 12 | *rs10480300* | 7 | T | C | 0.022311649 | 0.060724321 | 0.71330184 |
| 13 | *rs1178977* | 7 | A | G | 0.071820201 | 0.068001261 | 0.29089519 |
| 14 | *rs17786744* | 8 | A | G | 0.065254136 | 0.053531414 | 0.22284885 |
| 15 | *rs2941484* | 8 | T | C | -0.035984139 | 0.054895174 | 0.51214175 |
| 16 | *rs10821905* | 10 | A | G | 0.031760984 | 0.069845952 | 0.64930417 |
| 17 | *rs1171614* | 10 | T | C | -0.048584697 | 0.065669924 | 0.45940207 |
| 18 | *rs2078267* | 11 | T | C | 0.0146452 | 0.054010718 | 0.78627291 |
| 19 | *rs478607* | 11 | A | G | -0.023259157 | 0.072501707 | 0.74835559 |
| 20 | *rs3741414* | 12 | T | C | 0.02226296 | 0.060151859 | 0.71129861 |
| 21 | *rs653178* | 12 | T | C | 0.185228205 | 0.054056331 | 0.00061124 |
| 22 | *rs1394125* | 15 | A | G | 0.045824248 | 0.057209424 | 0.42313671 |
| 23 | *rs6598541* | 15 | A | G | 0.08190445 | 0.054770039 | 0.13480373 |
| 24 | *rs7188445* | 16 | A | G | -0.095872057 | 0.057120516 | 0.09326568 |
| 25 | *rs7193778* | 16 | T | C | -0.125014753 | 0.072749075 | 0.08571681 |
| 26 | *rs7224610* | 17 | A | C | -0.023305884 | 0.054138999 | 0.66684479 |

MDCS-MPP: Malmö Diet Cancer Study and Malmö Preventive Project, SNP: SNP number; Chr: chromosome; EA: effect allele; OA: other allele; G: genetic variant or SNP, Y: outcome (cancer in this case); GY: beta for the SNP-cancer association; SE-GY: standard error of GY; p: p-value of GY.

'Estimates are adjusted for age.

SNP-cancer association analyses were done after excluding controls.

**Table S12: The association estimates of the 26 SNPs for urate with gynecological cancer in the MDCS-MPP cohort**

|  | SNP | Chr | EA | OA | GY' | SE-GY | *p* |
| --- | --- | --- | --- | --- | --- | --- | --- |
| 1 | *rs11264341* | 1 | T | C | 0.071536831 | 0.053180131 | 0.17856722 |
| 2 | *rs1471633* | 1 | A | C | 0.013392602 | 0.090904533 | 0.8828747 |
| 3 | *rs1260326* | 2 | T | C | -0.013224736 | 0.054682873 | 0.80890088 |
| 4 | *rs17050272* | 2 | A | G | 0.074157392 | 0.0538044 | 0.16811764 |
| 5 | *rs6770152* | 3 | T | G | -0.007153032 | 0.053695348 | 0.89402326 |
| 6 | *rs12498742* | 4 | A | G | 0.089806688 | 0.064424119 | 0.16332011 |
| 7 | *rs2231142* | 4 | T | G | 0.028107021 | 0.084720717 | 0.74006981 |
| 8 | *rs17632159* | 5 | C | G | -0.045412537 | 0.061816303 | 0.46256066 |
| 9 | *rs1165151* | 6 | T | G | 0.068843944 | 0.052972025 | 0.19372839 |
| 10 | *rs675209* | 6 | T | C | -0.042767601 | 0.060748333 | 0.48142483 |
| 11 | *rs729761* | 6 | T | G | 0.051004963 | 0.058813195 | 0.38581231 |
| 12 | *rs10480300* | 7 | T | C | -0.099115698 | 0.061449824 | 0.10675465 |
| 13 | *rs1178977* | 7 | A | G | 0.063611564 | 0.066247568 | 0.33694964 |
| 14 | *rs17786744* | 8 | A | G | -0.013854626 | 0.052664978 | 0.79249589 |
| 15 | *rs2941484* | 8 | T | C | 0.01735908 | 0.053869332 | 0.74726769 |
| 16 | *rs10821905* | 10 | A | G | -0.003800945 | 0.069195257 | 0.95619366 |
| 17 | *rs1171614* | 10 | T | C | 0.039018785 | 0.06280542 | 0.53442554 |
| 18 | *rs2078267* | 11 | T | C | -0.053019108 | 0.052942873 | 0.31661415 |
| 19 | *rs478607* | 11 | A | G | -0.062936485 | 0.070412627 | 0.37141616 |
| 20 | *rs3741414* | 12 | T | C | 0.028370532 | 0.058664853 | 0.62866724 |
| 21 | *rs653178* | 12 | T | C | 0.084721293 | 0.052970362 | 0.10972967 |
| 22 | *rs1394125* | 15 | A | G | 0.121362254 | 0.055716933 | 0.02939164 |
| 23 | *rs6598541* | 15 | A | G | -0.009860824 | 0.054566641 | 0.85659396 |
| 24 | *rs7188445* | 16 | A | G | -0.027390032 | 0.055472101 | 0.62147407 |
| 25 | *rs7193778* | 16 | T | C | 0.141930952 | 0.07747076 | 0.06694273 |
| 26 | *rs7224610* | 17 | A | C | -0.049540112 | 0.053371977 | 0.35330148 |

MDCS-MPP: Malmö Diet Cancer Study and Malmö Preventive Project, SNP: SNP number; Chr: chromosome; EA: effect allele; OA: other allele; G: genetic variant or SNP, Y: outcome (cancer in this case); GY: beta for the SNP-cancer association; SE-GY: standard error of GY; p: p-value of GY.

'Estimates are adjusted for age.

SNP-cancer association analyses were done after excluding controls.

**Table S13: The association estimates of the 26 SNPs for urate with gastric cancer in the MDCS-MPP cohort**

|  | SNP | Chr | EA | OA | GY' | SE-GY | *p* |
| --- | --- | --- | --- | --- | --- | --- | --- |
| 1 | *rs11264341* | 1 | T | C | -0.075712155 | 0.10867871 | 0.48601534 |
| 2 | *rs1471633* | 1 | A | C | -0.108622148 | 0.166233822 | 0.51347918 |
| 3 | *rs1260326* | 2 | T | C | -0.216583162 | 0.115352746 | 0.06043965 |
| 4 | *rs17050272* | 2 | A | G | 0.001429338 | 0.108841481 | 0.98952225 |
| 5 | *rs6770152* | 3 | T | G | -0.044145643 | 0.109370749 | 0.68648262 |
| 6 | *rs12498742* | 4 | A | G | 0.105979864 | 0.132741691 | 0.42464322 |
| 7 | *rs2231142* | 4 | T | G | -0.206913097 | 0.196867285 | 0.29324557 |
| 8 | *rs17632159* | 5 | C | G | -0.141485842 | 0.128245969 | 0.26992377 |
| 9 | *rs1165151* | 6 | T | G | -0.163067092 | 0.108278233 | 0.132067 |
| 10 | *rs675209* | 6 | T | C | -0.117309434 | 0.125529476 | 0.35003725 |
| 11 | *rs729761* | 6 | T | G | -0.007237478 | 0.121007488 | 0.95230683 |
| 12 | *rs10480300* | 7 | T | C | -0.039437125 | 0.124130677 | 0.75070757 |
| 13 | *rs1178977* | 7 | A | G | 0.11401641 | 0.138376198 | 0.40996246 |
| 14 | *rs17786744* | 8 | A | G | 0.215013561 | 0.109690117 | 0.04997349 |
| 15 | *rs2941484* | 8 | T | C | -0.075732333 | 0.10853201 | 0.48530979 |
| 16 | *rs10821905* | 10 | A | G | -0.071369351 | 0.142608841 | 0.61675452 |
| 17 | *rs1171614* | 10 | T | C | -0.305973118 | 0.142299173 | 0.0315386 |
| 18 | *rs2078267* | 11 | T | C | 0.16071924 | 0.108934602 | 0.14011212 |
| 19 | *rs478607* | 11 | A | G | -0.081142463 | 0.14193152 | 0.56752422 |
| 20 | *rs3741414* | 12 | T | C | -0.011314266 | 0.122375992 | 0.92633658 |
| 21 | *rs653178* | 12 | T | C | 0.130469152 | 0.107642746 | 0.22549053 |
| 22 | *rs1394125* | 15 | A | G | 0.045674893 | 0.115144592 | 0.6916077 |
| 23 | *rs6598541* | 15 | A | G | 0.057702514 | 0.110512906 | 0.60157723 |
| 24 | *rs7188445* | 16 | A | G | -0.055494343 | 0.114386828 | 0.6275726 |
| 25 | *rs7193778* | 16 | T | C | 0.184709294 | 0.163140969 | 0.25754755 |
| 26 | *rs7224610* | 17 | A | C | 0.029421133 | 0.110253512 | 0.78958477 |

MDCS-MPP: Malmö Diet Cancer Study and Malmö Preventive Project, SNP: SNP number; Chr: chromosome; EA: effect allele; OA: other allele; G: genetic variant or SNP, Y: outcome (cancer in this case); GY: beta for the SNP-cancer association; SE-GY: standard error of GY; p: p-value of GY.

'Estimates are adjusted for age and sex.

SNP-cancer association analyses were done after excluding controls.

**Table S14: The association estimates of the 26 SNPs for urate with hepatic cancer in the MDCS-MPP cohort**

|  | SNP | Chr | EA | OA | GY' | SE-GY | *p* |
| --- | --- | --- | --- | --- | --- | --- | --- |
| 1 | *rs11264341* | 1 | T | C | -0.046535 | 0.20658221 | 0.82177584 |
| 2 | *rs1471633* | 1 | A | C | 0.76619103 | 0.30315781 | 0.01149214 |
| 3 | *rs1260326* | 2 | T | C | -0.2301314 | 0.21754474 | 0.29012022 |
| 4 | *rs17050272* | 2 | A | G | 0.08162295 | 0.20531756 | 0.69096569 |
| 5 | *rs6770152* | 3 | T | G | -0.1032964 | 0.20688653 | 0.61757508 |
| 6 | *rs12498742* | 4 | A | G | 0.36370341 | 0.26926032 | 0.17677548 |
| 7 | *rs2231142* | 4 | T | G | -0.1501323 | 0.36613675 | 0.68177349 |
| 8 | *rs17632159* | 5 | C | G | 0.01807345 | 0.23576368 | 0.93889468 |
| 9 | *rs1165151* | 6 | T | G | 0.09233269 | 0.20183287 | 0.64733251 |
| 10 | *rs675209* | 6 | T | C | 0.12363493 | 0.22293978 | 0.57919123 |
| 11 | *rs729761* | 6 | T | G | 0.12700202 | 0.22068507 | 0.56496005 |
| 12 | *rs10480300* | 7 | T | C | 0.3932494 | 0.21756362 | 0.0706821 |
| 13 | *rs1178977* | 7 | A | G | 0.33337582 | 0.28029167 | 0.23428664 |
| 14 | *rs17786744* | 8 | A | G | -0.1912419 | 0.20289348 | 0.3458993 |
| 15 | *rs2941484* | 8 | T | C | -0.0060435 | 0.20586204 | 0.97658002 |
| 16 | *rs10821905* | 10 | A | G | 0.29219939 | 0.24474836 | 0.23252617 |
| 17 | *rs1171614* | 10 | T | C | 0.24951189 | 0.22848805 | 0.27482744 |
| 18 | *rs2078267* | 11 | T | C | 0.04378918 | 0.20578853 | 0.83149289 |
| 19 | *rs478607* | 11 | A | G | 0.52339901 | 0.33533811 | 0.11856864 |
| 20 | *rs3741414* | 12 | T | C | -0.5999548 | 0.27521558 | 0.02926155 |
| 21 | *rs653178* | 12 | T | C | 0.16932221 | 0.2049779 | 0.40877514 |
| 22 | *rs1394125* | 15 | A | G | 0.20960183 | 0.21325851 | 0.32567965 |
| 23 | *rs6598541* | 15 | A | G | -0.0916216 | 0.21295117 | 0.667016 |
| 24 | *rs7188445* | 16 | A | G | -0.1907715 | 0.22311903 | 0.39253954 |
| 25 | *rs7193778* | 16 | T | C | -0.3768362 | 0.25816239 | 0.14437616 |
| 26 | *rs7224610* | 17 | A | C | -0.2161677 | 0.20551627 | 0.29287853 |

MDCS-MPP: Malmö Diet Cancer Study and Malmö Preventive Project, SNP: SNP number; Chr: chromosome; EA: effect allele; OA: other allele; G: genetic variant or SNP, Y: outcome (cancer in this case); GY: beta for the SNP-cancer association; SE-GY: standard error of GY; p: p-value of GY.

'Estimates are adjusted for age and sex.

SNP-cancer association analyses were done after excluding controls.

**Table S15: The association estimates of the 26 SNPs for urate with skin cancer in the MDCS-MPP cohort**

|  | SNP | Chr | EA | OA | GY' | SE-GY | *p* |
| --- | --- | --- | --- | --- | --- | --- | --- |
| 1 | *rs11264341* | 1 | T | C | -0.005607639 | 0.073082706 | 0.93883831 |
| 2 | *rs1471633* | 1 | A | C | 0.048065763 | 0.114157396 | 0.67371991 |
| 3 | *rs1260326* | 2 | T | C | 0.010644723 | 0.074777289 | 0.8868017 |
| 4 | *rs17050272* | 2 | A | G | 0.046741611 | 0.073197568 | 0.52310413 |
| 5 | *rs6770152* | 3 | T | G | 0.052953676 | 0.074230822 | 0.47561988 |
| 6 | *rs12498742* | 4 | A | G | -0.106496546 | 0.084507187 | 0.20759471 |
| 7 | *rs2231142* | 4 | T | G | -0.07809107 | 0.124767456 | 0.53138516 |
| 8 | *rs17632159* | 5 | C | G | -0.100967642 | 0.085711621 | 0.23879962 |
| 9 | *rs1165151* | 6 | T | G | -0.138987597 | 0.07293784 | 0.05670702 |
| 10 | *rs675209* | 6 | T | C | -0.076825701 | 0.083976422 | 0.36027119 |
| 11 | *rs729761* | 6 | T | G | -0.104832245 | 0.083330578 | 0.20838144 |
| 12 | *rs10480300* | 7 | T | C | -0.018713816 | 0.083118767 | 0.82186609 |
| 13 | *rs1178977* | 7 | A | G | 0.076693799 | 0.092095911 | 0.40498005 |
| 14 | *rs17786744* | 8 | A | G | 0.04165706 | 0.072990522 | 0.5681903 |
| 15 | *rs2941484* | 8 | T | C | -0.0015852 | 0.073069195 | 0.98269165 |
| 16 | *rs10821905* | 10 | A | G | 0.109184668 | 0.091372031 | 0.23210802 |
| 17 | *rs1171614* | 10 | T | C | -0.074582076 | 0.089147763 | 0.40281078 |
| 18 | *rs2078267* | 11 | T | C | -0.075826433 | 0.072805688 | 0.29764796 |
| 19 | *rs478607* | 11 | A | G | -0.054119759 | 0.09643381 | 0.57465339 |
| 20 | *rs3741414* | 12 | T | C | 0.031305062 | 0.081639722 | 0.70138331 |
| 21 | *rs653178* | 12 | T | C | 0.022977393 | 0.072244054 | 0.7504452 |
| 22 | *rs1394125* | 15 | A | G | -0.01391127 | 0.078222116 | 0.85884613 |
| 23 | *rs6598541* | 15 | A | G | -0.037382727 | 0.07572252 | 0.62153188 |
| 24 | *rs7188445* | 16 | A | G | -0.068342241 | 0.077276088 | 0.37648543 |
| 25 | *rs7193778* | 16 | T | C | 0.181672516 | 0.109884213 | 0.09826807 |
| 26 | *rs7224610* | 17 | A | C | -0.123089096 | 0.073105938 | 0.092238 |

MDCS-MPP: Malmö Diet Cancer Study and Malmö Preventive Project, SNP: SNP number; Chr: chromosome; EA: effect allele; OA: other allele; G: genetic variant or SNP, Y: outcome (cancer in this case); GY: beta for the SNP-cancer association; SE-GY: standard error of GY; p: p-value of GY.

'Estimates are adjusted for age and sex.

SNP-cancer association analyses were done after excluding controls.

**Table S16: The association estimates of the 26 SNPs for urate with renal cancer in the MDCS-MPP cohort**

|  | SNP | Chr | EA | OA | GY' | SE-GY | *p* |
| --- | --- | --- | --- | --- | --- | --- | --- |
| 1 | *rs11264341* | 1 | T | C | 0.135616377 | 0.106349389 | 0.20223967 |
| 2 | *rs1471633* | 1 | A | C | -0.044169984 | 0.164953911 | 0.78887508 |
| 3 | *rs1260326* | 2 | T | C | 0.017669018 | 0.109331303 | 0.87161308 |
| 4 | *rs17050272* | 2 | A | G | 0.056490337 | 0.107033005 | 0.59764907 |
| 5 | *rs6770152* | 3 | T | G | -0.09073699 | 0.107548163 | 0.39884432 |
| 6 | *rs12498742* | 4 | A | G | -0.073981722 | 0.124546954 | 0.55250765 |
| 7 | *rs2231142* | 4 | T | G | 0.066090495 | 0.172779293 | 0.70208016 |
| 8 | *rs17632159* | 5 | C | G | 0.066328288 | 0.121470966 | 0.58503685 |
| 9 | *rs1165151* | 6 | T | G | 0.053843732 | 0.10580758 | 0.61083388 |
| 10 | *rs675209* | 6 | T | C | -0.046787169 | 0.121677711 | 0.70059517 |
| 11 | *rs729761* | 6 | T | G | -0.044716078 | 0.119991055 | 0.7094002 |
| 12 | *rs10480300* | 7 | T | C | 0.144852226 | 0.117808599 | 0.21886355 |
| 13 | *rs1178977* | 7 | A | G | -0.219248653 | 0.123963767 | 0.07695212 |
| 14 | *rs17786744* | 8 | A | G | -0.065869344 | 0.106126089 | 0.53481637 |
| 15 | *rs2941484* | 8 | T | C | -0.027578097 | 0.1072227 | 0.79702137 |
| 16 | *rs10821905* | 10 | A | G | -0.026767914 | 0.139163145 | 0.84746871 |
| 17 | *rs1171614* | 10 | T | C | 0.011289022 | 0.127164246 | 0.92926063 |
| 18 | *rs2078267* | 11 | T | C | 0.00417322 | 0.106725765 | 0.96880885 |
| 19 | *rs478607* | 11 | A | G | -0.157926127 | 0.136634448 | 0.2477509 |
| 20 | *rs3741414* | 12 | T | C | 0.137534574 | 0.117024644 | 0.23989006 |
| 21 | *rs653178* | 12 | T | C | 0.015206332 | 0.105815185 | 0.88573222 |
| 22 | *rs1394125* | 15 | A | G | 0.176298455 | 0.111591264 | 0.11413918 |
| 23 | *rs6598541* | 15 | A | G | -0.10026005 | 0.111561501 | 0.36881377 |
| 24 | *rs7188445* | 16 | A | G | 0.046277027 | 0.111453841 | 0.67798635 |
| 25 | *rs7193778* | 16 | T | C | 0.10349924 | 0.156869716 | 0.50939609 |
| 26 | *rs7224610* | 17 | A | C | 0.064526708 | 0.109161665 | 0.55444576 |

MDCS-MPP: Malmö Diet Cancer Study and Malmö Preventive Project, SNP: SNP number; Chr: chromosome; EA: effect allele; OA: other allele; G: genetic variant or SNP, Y: outcome (cancer in this case); GY: beta for the SNP-cancer association; SE-GY: standard error of GY; p: p-value of GY.

'Estimates are adjusted for age and sex.

SNP-cancer association analyses were done after excluding controls.

**Table S17: The association estimates of the 26 SNPs for urate with lung cancer in the MDCS-MPP cohort**

|  | SNP | Chr | EA | OA | GY' | SE-GY | *p* |
| --- | --- | --- | --- | --- | --- | --- | --- |
| 1 | *rs11264341* | 1 | T | C | 0.050501998 | 0.062080737 | 0.41593774 |
| 2 | *rs1471633* | 1 | A | C | 0.033477736 | 0.09739797 | 0.73105605 |
| 3 | *rs1260326* | 2 | T | C | 0.098133561 | 0.063249919 | 0.12077694 |
| 4 | *rs17050272* | 2 | A | G | -0.043158041 | 0.062990883 | 0.4932509 |
| 5 | *rs6770152* | 3 | T | G | -0.110038869 | 0.062654648 | 0.07904125 |
| 6 | *rs12498742* | 4 | A | G | -0.005605276 | 0.074065981 | 0.93967409 |
| 7 | *rs2231142* | 4 | T | G | 0.150691254 | 0.097278451 | 0.12136459 |
| 8 | *rs17632159* | 5 | C | G | 0.003814736 | 0.071766639 | 0.95760863 |
| 9 | *rs1165151* | 6 | T | G | -0.025941624 | 0.061938658 | 0.67534208 |
| 10 | *rs675209* | 6 | T | C | 0.028879783 | 0.069873047 | 0.67937369 |
| 11 | *rs729761* | 6 | T | G | 0.014848277 | 0.069117255 | 0.82990192 |
| 12 | *rs10480300* | 7 | T | C | 0.003365161 | 0.070716771 | 0.96204582 |
| 13 | *rs1178977* | 7 | A | G | 0.047576514 | 0.077927146 | 0.54151372 |
| 14 | *rs17786744* | 8 | A | G | 0.008590634 | 0.062093734 | 0.88996425 |
| 15 | *rs2941484* | 8 | T | C | 0.027561878 | 0.06247633 | 0.65909925 |
| 16 | *rs10821905* | 10 | A | G | 0.015563626 | 0.080113234 | 0.8459642 |
| 17 | *rs1171614* | 10 | T | C | 0.093341663 | 0.07274814 | 0.19946415 |
| 18 | *rs2078267* | 11 | T | C | 0.001612467 | 0.062266906 | 0.97934025 |
| 19 | *rs478607* | 11 | A | G | -0.164279759 | 0.079615049 | 0.03907218 |
| 20 | *rs3741414* | 12 | T | C | 0.005914721 | 0.070074273 | 0.93273327 |
| 21 | *rs653178* | 12 | T | C | -0.045138018 | 0.061617718 | 0.46383334 |
| 22 | *rs1394125* | 15 | A | G | 0.07343529 | 0.06573368 | 0.26392428 |
| 23 | *rs6598541* | 15 | A | G | 0.019461755 | 0.064018344 | 0.76112576 |
| 24 | *rs7188445* | 16 | A | G | 0.018994608 | 0.065021821 | 0.77018977 |
| 25 | *rs7193778* | 16 | T | C | 0.048511271 | 0.089549956 | 0.58800934 |
| 26 | *rs7224610* | 17 | A | C | -0.025282506 | 0.062797705 | 0.68724075 |

MDCS-MPP: Malmö Diet Cancer Study and Malmö Preventive Project, SNP: SNP number; Chr: chromosome; EA: effect allele; OA: other allele; G: genetic variant or SNP, Y: outcome (cancer in this case); GY: beta for the SNP-cancer association; SE-GY: standard error of GY; p: p-value of GY.

'Estimates are adjusted for age and sex.

SNP-cancer association analyses were done after excluding controls.

**Table S18: The association estimates of the 26 SNPs for urate with lymphatic and hematopoietic cancer in the MDCS-MPP cohort**

|  | SNP | Chr | EA | OA | GY' | SE-GY | *p* |
| --- | --- | --- | --- | --- | --- | --- | --- |
| 1 | *rs11264341* | 1 | T | C | -0.066415854 | 0.068082629 | 0.3293032 |
| 2 | *rs1471633* | 1 | A | C | -0.108799498 | 0.106667584 | 0.30773485 |
| 3 | *rs1260326* | 2 | T | C | 0.011434261 | 0.069369012 | 0.8690759 |
| 4 | *rs17050272* | 2 | A | G | 0.054693445 | 0.067938705 | 0.42079601 |
| 5 | *rs6770152* | 3 | T | G | -0.000273199 | 0.068532429 | 0.99681931 |
| 6 | *rs12498742* | 4 | A | G | 0.042209796 | 0.081276686 | 0.60352742 |
| 7 | *rs2231142* | 4 | T | G | -0.122400439 | 0.117474471 | 0.29744309 |
| 8 | *rs17632159* | 5 | C | G | -0.076397484 | 0.079118941 | 0.33424289 |
| 9 | *rs1165151* | 6 | T | G | 0.02342256 | 0.06716101 | 0.72727524 |
| 10 | *rs675209* | 6 | T | C | 0.007399248 | 0.076284626 | 0.92273015 |
| 11 | *rs729761* | 6 | T | G | 0.137848708 | 0.073220734 | 0.05974838 |
| 12 | *rs10480300* | 7 | T | C | 0.03509979 | 0.076084402 | 0.64456401 |
| 13 | *rs1178977* | 7 | A | G | 0.0510772 | 0.084666756 | 0.54632684 |
| 14 | *rs17786744* | 8 | A | G | -0.086802682 | 0.067129239 | 0.19598748 |
| 15 | *rs2941484* | 8 | T | C | 0.016050338 | 0.067803902 | 0.81287633 |
| 16 | *rs10821905* | 10 | A | G | 0.116401335 | 0.084569863 | 0.16870012 |
| 17 | *rs1171614* | 10 | T | C | 0.003588195 | 0.08072821 | 0.96454742 |
| 18 | *rs2078267* | 11 | T | C | 0.020244767 | 0.06762779 | 0.76466863 |
| 19 | *rs478607* | 11 | A | G | 0.002496336 | 0.091200373 | 0.97816304 |
| 20 | *rs3741414* | 12 | T | C | -0.078043849 | 0.077646946 | 0.3148431 |
| 21 | *rs653178* | 12 | T | C | 0.065133207 | 0.06701413 | 0.33108416 |
| 22 | *rs1394125* | 15 | A | G | 0.132886738 | 0.070987651 | 0.06121078 |
| 23 | *rs6598541* | 15 | A | G | 0.074477578 | 0.068918851 | 0.27985011 |
| 24 | *rs7188445* | 16 | A | G | -0.047303678 | 0.071401912 | 0.50765164 |
| 25 | *rs7193778* | 16 | T | C | -0.060063691 | 0.093919278 | 0.5224817 |
| 26 | *rs7224610* | 17 | A | C | -0.049136134 | 0.06813649 | 0.4708217 |

MDCS-MPP: Malmö Diet Cancer Study and Malmö Preventive Project, SNP: SNP number; Chr: chromosome; EA: effect allele; OA: other allele; G: genetic variant or SNP, Y: outcome (cancer in this case); GY: beta for the SNP-cancer association; SE-GY: standard error of GY; p: p-value of GY.

'Estimates are adjusted for age and sex.

SNP-cancer association analyses were done after excluding controls.

**Table S19: The association estimates of the 26 SNPs for urate with pancreatic cancer in the MDCS-MPP cohort**

|  | SNP | Chr | EA | OA | GY' | SE-GY | *p* |
| --- | --- | --- | --- | --- | --- | --- | --- |
| 1 | *rs11264341* | 1 | T | C | 0.159629465 | 0.130314343 | 0.22059143 |
| 2 | *rs1471633* | 1 | A | C | 0.137833187 | 0.203454455 | 0.49811123 |
| 3 | *rs1260326* | 2 | T | C | 0.234293206 | 0.129871166 | 0.07122452 |
| 4 | *rs17050272* | 2 | A | G | -0.207287808 | 0.134907974 | 0.1244127 |
| 5 | *rs6770152* | 3 | T | G | -0.135233521 | 0.13123716 | 0.30279813 |
| 6 | *rs12498742* | 4 | A | G | -0.003022878 | 0.154034858 | 0.98434281 |
| 7 | *rs2231142* | 4 | T | G | 0.317539918 | 0.19085113 | 0.09615051 |
| 8 | *rs17632159* | 5 | C | G | 0.087118701 | 0.148321851 | 0.55696024 |
| 9 | *rs1165151* | 6 | T | G | 0.038881279 | 0.128633406 | 0.76245064 |
| 10 | *rs675209* | 6 | T | C | -0.00926959 | 0.146553084 | 0.94956684 |
| 11 | *rs729761* | 6 | T | G | 0.228937285 | 0.137409703 | 0.09569498 |
| 12 | *rs10480300* | 7 | T | C | -0.192273156 | 0.156020395 | 0.21781497 |
| 13 | *rs1178977* | 7 | A | G | -0.083176017 | 0.15597211 | 0.59384328 |
| 14 | *rs17786744* | 8 | A | G | -0.011742112 | 0.128974261 | 0.92745899 |
| 15 | *rs2941484* | 8 | T | C | 0.128523299 | 0.130956015 | 0.32638399 |
| 16 | *rs10821905* | 10 | A | G | 0.02550925 | 0.168081774 | 0.87937079 |
| 17 | *rs1171614* | 10 | T | C | 0.05730628 | 0.152500225 | 0.7070817 |
| 18 | *rs2078267* | 11 | T | C | -0.086949373 | 0.130751257 | 0.50605153 |
| 19 | *rs478607* | 11 | A | G | -0.096929468 | 0.170833569 | 0.57044841 |
| 20 | *rs3741414* | 12 | T | C | 0.213052098 | 0.141371464 | 0.13180104 |
| 21 | *rs653178* | 12 | T | C | 0.155910437 | 0.130536694 | 0.2323293 |
| 22 | *rs1394125* | 15 | A | G | -0.055206606 | 0.141581849 | 0.69659042 |
| 23 | *rs6598541* | 15 | A | G | 0.270506522 | 0.129265509 | 0.03638106 |
| 24 | *rs7188445* | 16 | A | G | 0.058821411 | 0.136218227 | 0.66587407 |
| 25 | *rs7193778* | 16 | T | C | -0.041597129 | 0.182606463 | 0.81980438 |
| 26 | *rs7224610* | 17 | A | C | 0.35480939 | 0.139732113 | 0.01111026 |

MDCS-MPP: Malmö Diet Cancer Study and Malmö Preventive Project, SNP: SNP number; Chr: chromosome; EA: effect allele; OA: other allele; G: genetic variant or SNP, Y: outcome (cancer in this case); GY: beta for the SNP-cancer association; SE-GY: standard error of GY; p: p-value of GY.

'Estimates are adjusted for age and sex.

SNP-cancer association analyses were done after excluding controls.

**Table S20: The association estimates of the 26 SNPs for urate with prostate cancer in the MDCS-MPP cohort**

|  | SNP | Chr | EA | OA | GY' | SE-GY | *p* |
| --- | --- | --- | --- | --- | --- | --- | --- |
| 1 | *rs11264341* | 1 | T | C | -0.009362382 | 0.040384857 | 0.81667081 |
| 2 | *rs1471633* | 1 | A | C | -0.032514527 | 0.060494198 | 0.59093489 |
| 3 | *rs1260326* | 2 | T | C | 0.063351804 | 0.041066876 | 0.12291579 |
| 4 | *rs17050272* | 2 | A | G | -0.051237649 | 0.040466589 | 0.20545162 |
| 5 | *rs6770152* | 3 | T | G | -0.030438355 | 0.040787341 | 0.45550454 |
| 6 | *rs12498742* | 4 | A | G | 0.00769286 | 0.047710546 | 0.87190418 |
| 7 | *rs2231142* | 4 | T | G | 0.049269663 | 0.067038746 | 0.46237415 |
| 8 | *rs17632159* | 5 | C | G | -0.051040853 | 0.046738799 | 0.2748135 |
| 9 | *rs1165151* | 6 | T | G | -0.022659898 | 0.03980336 | 0.5691552 |
| 10 | *rs675209* | 6 | T | C | 0.018196364 | 0.045006439 | 0.68598787 |
| 11 | *rs729761* | 6 | T | G | -0.015911548 | 0.04493334 | 0.72325307 |
| 12 | *rs10480300* | 7 | T | C | 0.047691613 | 0.045582282 | 0.29543397 |
| 13 | *rs1178977* | 7 | A | G | -0.029983113 | 0.049345524 | 0.54344241 |
| 14 | *rs17786744* | 8 | A | G | 0.011891475 | 0.040072795 | 0.76665981 |
| 15 | *rs2941484* | 8 | T | C | -0.02825733 | 0.040181947 | 0.48190965 |
| 16 | *rs10821905* | 10 | A | G | -0.027595717 | 0.052442156 | 0.59874058 |
| 17 | *rs1171614* | 10 | T | C | 0.008531302 | 0.047861365 | 0.85852641 |
| 18 | *rs2078267* | 11 | T | C | -0.007078773 | 0.040054804 | 0.85972268 |
| 19 | *rs478607* | 11 | A | G | -0.059803839 | 0.053337698 | 0.26218988 |
| 20 | *rs3741414* | 12 | T | C | 0.049443386 | 0.045118031 | 0.27313674 |
| 21 | *rs653178* | 12 | T | C | -0.011065556 | 0.03983584 | 0.78118209 |
| 22 | *rs1394125* | 15 | A | G | -0.027185321 | 0.043219601 | 0.52934614 |
| 23 | *rs6598541* | 15 | A | G | 0.076093937 | 0.041177935 | 0.06461249 |
| 24 | *rs7188445* | 16 | A | G | 0.024602059 | 0.042311296 | 0.56093472 |
| 25 | *rs7193778* | 16 | T | C | -0.070858938 | 0.055996012 | 0.20571784 |
| 26 | *rs7224610* | 17 | A | C | 0.016321296 | 0.041113427 | 0.69138064 |

MDCS-MPP: Malmö Diet Cancer Study and Malmö Preventive Project, SNP: SNP number; Chr: chromosome; EA: effect allele; OA: other allele; G: genetic variant or SNP, Y: outcome (cancer in this case); GY: beta for the SNP-cancer association; SE-GY: standard error of GY; p: p-value of GY.

'Estimates are adjusted for age.

SNP-cancer association analyses were done after excluding controls.

**Table S21: The association estimates of the 26 SNPs for urate with All-cause cancer in the MDCS-MPP cohort**

|  | SNP | Chr | EA | OA | GY' | SE-GY | *p* |
| --- | --- | --- | --- | --- | --- | --- | --- |
| 1 | *rs11264341* | 1 | T | C | 0.018727249 | 0.022995139 | 0.41541564 |
| 2 | *rs1471633* | 1 | A | C | -0.000166259 | 0.036575312 | 0.99637309 |
| 3 | *rs1260326* | 2 | T | C | 0.017541272 | 0.023571424 | 0.45677042 |
| 4 | *rs17050272* | 2 | A | G | 0.002990844 | 0.023099978 | 0.89698269 |
| 5 | *rs6770152* | 3 | T | G | -0.015322617 | 0.023289147 | 0.51058345 |
| 6 | *rs12498742* | 4 | A | G | 0.019403262 | 0.027351239 | 0.47806965 |
| 7 | *rs2231142* | 4 | T | G | -0.011187919 | 0.038332851 | 0.77039182 |
| 8 | *rs17632159* | 5 | C | G | -0.015916306 | 0.026592432 | 0.54948791 |
| 9 | *rs1165151* | 6 | T | G | -0.010397262 | 0.022862482 | 0.64927184 |
| 10 | *rs675209* | 6 | T | C | -0.005334226 | 0.025985353 | 0.83735478 |
| 11 | *rs729761* | 6 | T | G | -0.011823559 | 0.025710588 | 0.64560867 |
| 12 | *rs10480300* | 7 | T | C | 0.013696463 | 0.026066162 | 0.59927045 |
| 13 | *rs1178977* | 7 | A | G | 0.018367305 | 0.028580923 | 0.52045633 |
| 14 | *rs17786744* | 8 | A | G | 0.025129328 | 0.02278619 | 0.27010034 |
| 15 | *rs2941484* | 8 | T | C | 6.62E-05 | 0.023089444 | 0.9977129 |
| 16 | *rs10821905* | 10 | A | G | -0.018135401 | 0.02996685 | 0.54505801 |
| 17 | *rs1171614* | 10 | T | C | -0.003622469 | 0.027484015 | 0.8951403 |
| 18 | *rs2078267* | 11 | T | C | 0.009724534 | 0.022919376 | 0.67135203 |
| 19 | *rs478607* | 11 | A | G | -0.065954822 | 0.030558209 | 0.03090187 |
| 20 | *rs3741414* | 12 | T | C | 0.028244003 | 0.025657465 | 0.27097922 |
| 21 | *rs653178* | 12 | T | C | 0.036042975 | 0.022774958 | 0.1135194 |
| 22 | *rs1394125* | 15 | A | G | 0.036921986 | 0.024415943 | 0.13048094 |
| 23 | *rs6598541* | 15 | A | G | 0.057929265 | 0.023656591 | 0.01433497 |
| 24 | *rs7188445* | 16 | A | G | -0.019120688 | 0.024145153 | 0.42841559 |
| 25 | *rs7193778* | 16 | T | C | -0.015614272 | 0.032315212 | 0.62896337 |
| 26 | *rs7224610* | 17 | A | C | -0.015153139 | 0.023241004 | 0.51440105 |

MDCS-MPP: Malmö Diet Cancer Study and Malmö Preventive Project, SNP: SNP number; Chr: chromosome; EA: effect allele; OA: other allele; G: genetic variant or SNP, Y: outcome (cancer in this case); GY: beta for the SNP-cancer association; SE-GY: standard error of GY; p: p-value of GY.

'Estimates are adjusted for age and sex.

SNP-cancer association analyses were done after excluding controls.

**Table S22: The association estimates of the 26 SNPs for urate with bladder cancer in the UK-Biobank cohort**

|  | SNP | Chr | EA | OA | EAF | GY^ | SE-GY | *p* |
| --- | --- | --- | --- | --- | --- | --- | --- | --- |
| 1 | *rs11264341* | 1 | T | C | 0.43 | -0.0069464 | 0.0304242 | 0.819 |
| 2 | *rs1471633* | 1 | A | C | 0.46 | -0.000786 | 0.0301725 | 0.979 |
| 3 | *rs1260326* | 2 | T | C | 0.4 | 0.0150914 | 0.0307701 | 0.624 |
| 4 | *rs17050272* | 2 | A | G | 0.41 | 0.0538012 | 0.0305862 | 0.079 |
| 5 | *rs6770152* | 3 | T | G | 0.58 | -0.002631 | 0.0318842 | 0.934 |
| 6 | *rs12498742* | 4 | A | G | 0.77 | 0.0126097 | 0.0356619 | 0.724 |
| 7 | *rs2231142* | 4 | T | G | 0.11 | -0.0005207 | 0.0474596 | 0.991 |
| 8 | *rs17632159* | 5 | C | G | 0.3 | -0.0335004 | 0.0327587 | 0.306 |
| 9 | *rs1165151* | 6 | T | G | 0.45 | 0.0360268 | 0.0302757 | 0.234 |
| 10 | *rs675209* | 6 | T | C | 0.27 | 0.0328896 | 0.0339725 | 0.333 |
| 11 | *rs729761* | 6 | T | G | 0.29 | -0.0049399 | 0.0335245 | 0.883 |
| 12 | *rs10480300* | 7 | T | C | 0.27 | 0.0135422 | 0.0337445 | 0.688 |
| 13 | *rs1178977* | 7 | A | G | 0.8 | -0.0081452 | 0.0379409 | 0.83 |
| 14 | *rs17786744* | 8 | A | G | 0.59 | -0.0604109 | 0.0306639 | 0.049 |
| 15 | *rs2941484* | 8 | T | C | 0.45 | -0.0426404 | 0.0304514 | 0.161 |
| 16 | *rs10821905* | 10 | A | G | 0.18 | -0.0188391 | 0.0393197 | 0.632 |
| 17 | *rs1171614* | 10 | T | C | 0.23 | 0.00044745 | 0.0357528 | 0.99 |
| 18 | *rs2078267* | 11 | T | C | 0.55 | -0.0389747 | 0.0301853 | 0.197 |
| 19 | *rs478607* | 11 | A | G | 0.85 | 0.00523169 | 0.0418806 | 0.901 |
| 20 | *rs3741414* | 12 | T | C | 0.24 | -0.0071505 | 0.0351037 | 0.839 |
| 21 | *rs653178* | 12 | T | C | 0.52 | -0.0181912 | 0.0301301 | 0.546 |
| 22 | *rs1394125* | 15 | A | G | 0.36 | 0.00303187 | 0.0313298 | 0.923 |
| 23 | *rs6598541* | 15 | A | G | 0.36 | 0.0655371 | 0.0315101 | 0.038 |
| 24 | *rs7188445* | 16 | A | G | 0.33 | 0.0291561 | 0.0320688 | 0.363 |
| 25 | *rs7193778* | 16 | T | C | 0.85 | 0.0305398 | 0.0423572 | 0.471 |
| 26 | *rs7224610* | 17 | A | C | 0.6 | 0.00252069 | 0.0310204 | 0.935 |

SNP: SNP number; Chr: chromosome; EA: effect allele; OA: other allele; EAF: effect allele frequency; G: genetic variant or SNP, Y: outcome (cancer in this case); GY: beta for the SNP-cancer association; SE-GY: standard error of GY; *p*: p-value of GY.

^Estimates are adjusted for age, sex and first principal component. SNP-cancer association analyses were done after excluding controls.

**Table S23: The association estimates of the 26 SNPs for urate with colorectal cancer in the UK-Biobank cohort**

|  | SNP | Chr | EA | OA | EAF | GY^ | SE-GY | *p* |
| --- | --- | --- | --- | --- | --- | --- | --- | --- |
| 1 | *rs11264341* | 1 | T | C | 0.43 | -0.0032903 | 0.0215676 | 0.879 |
| 2 | *rs1471633* | 1 | A | C | 0.46 | -0.014605 | 0.0214111 | 0.495 |
| 3 | *rs1260326* | 2 | T | C | 0.4 | 0.00588882 | 0.0218188 | 0.787 |
| 4 | *rs17050272* | 2 | A | G | 0.41 | -0.0460615 | 0.0217123 | 0.034 |
| 5 | *rs6770152* | 3 | T | G | 0.58 | 0.0979834 | 0.0226074 | 1.46E-05 |
| 6 | *rs12498742* | 4 | A | G | 0.77 | -0.0349066 | 0.0252699 | 0.167 |
| 7 | *rs2231142* | 4 | T | G | 0.11 | -0.045014 | 0.0335008 | 0.179 |
| 8 | *rs17632159* | 5 | C | G | 0.3 | -0.0306629 | 0.0232246 | 0.187 |
| 9 | *rs1165151* | 6 | T | G | 0.45 | 0.036686 | 0.0214524 | 0.087 |
| 10 | *rs675209* | 6 | T | C | 0.27 | -0.0048292 | 0.0240487 | 0.841 |
| 11 | *rs729761* | 6 | T | G | 0.29 | -0.00663 | 0.0237776 | 0.78 |
| 12 | *rs10480300* | 7 | T | C | 0.27 | 0.00492727 | 0.0239143 | 0.837 |
| 13 | *rs1178977* | 7 | A | G | 0.8 | -0.0615427 | 0.0268253 | 0.022 |
| 14 | *rs17786744* | 8 | A | G | 0.59 | -0.015244 | 0.0217578 | 0.484 |
| 15 | *rs2941484* | 8 | T | C | 0.45 | -0.0023016 | 0.0215914 | 0.915 |
| 16 | *rs10821905* | 10 | A | G | 0.18 | -0.0998951 | 0.0278769 | 0.0003391 |
| 17 | *rs1171614* | 10 | T | C | 0.23 | 0.0179935 | 0.0253672 | 0.478 |
| 18 | *rs2078267* | 11 | T | C | 0.55 | 0.0123288 | 0.0214246 | 0.565 |
| 19 | *rs478607* | 11 | A | G | 0.85 | 0.0576904 | 0.0297211 | 0.052 |
| 20 | *rs3741414* | 12 | T | C | 0.24 | 0.0671294 | 0.0249172 | 0.007 |
| 21 | *rs653178* | 12 | T | C | 0.52 | 0.0974522 | 0.0213504 | 5.01E-06 |
| 22 | *rs1394125* | 15 | A | G | 0.36 | -0.0033344 | 0.0222133 | 0.881 |
| 23 | *rs6598541* | 15 | A | G | 0.36 | 0.0260126 | 0.0223447 | 0.244 |
| 24 | *rs7188445* | 16 | A | G | 0.33 | -0.0363965 | 0.0227639 | 0.11 |
| 25 | *rs7193778* | 16 | T | C | 0.85 | -0.0394931 | 0.0299504 | 0.187 |
| 26 | *rs7224610* | 17 | A | C | 0.6 | 0.0213204 | 0.0219794 | 0.332 |

SNP: SNP number; Chr: chromosome; EA: effect allele; OA: other allele; EAF: effect allele frequency; G: genetic variant or SNP, Y: outcome (cancer in this case); GY: beta for the SNP-cancer association; SE-GY: standard error of GY; *p*: p-value of GY.

^Estimates are adjusted for age, sex and first principal component. SNP-cancer association analyses were done after excluding controls.

**Table S24: The association estimates of the 26 SNPs for urate with brain tumor in the UK-Biobank cohort**

|  | SNP | Chr | EA | OA | EAF | GY^ | SE-GY | *p* |
| --- | --- | --- | --- | --- | --- | --- | --- | --- |
| 1 | *rs11264341* | 1 | T | C | 0.43 | -0.031685 | 0.0589405 | 0.591 |
| 2 | *rs1471633* | 1 | A | C | 0.46 | -0.0987199 | 0.0585786 | 0.092 |
| 3 | *rs1260326* | 2 | T | C | 0.4 | 0.0522866 | 0.0596886 | 0.381 |
| 4 | *rs17050272* | 2 | A | G | 0.41 | 0.0281363 | 0.059343 | 0.635 |
| 5 | *rs6770152* | 3 | T | G | 0.58 | 0.0524442 | 0.0618178 | 0.396 |
| 6 | *rs12498742* | 4 | A | G | 0.77 | 0.0632789 | 0.0690649 | 0.36 |
| 7 | *rs2231142* | 4 | T | G | 0.11 | -0.0288031 | 0.0917087 | 0.753 |
| 8 | *rs17632159* | 5 | C | G | 0.3 | 0.00773879 | 0.0635712 | 0.903 |
| 9 | *rs1165151* | 6 | T | G | 0.45 | 0.0789672 | 0.0587243 | 0.179 |
| 10 | *rs675209* | 6 | T | C | 0.27 | -0.0540494 | 0.0657056 | 0.411 |
| 11 | *rs729761* | 6 | T | G | 0.29 | 0.0233139 | 0.0650159 | 0.72 |
| 12 | *rs10480300* | 7 | T | C | 0.27 | -0.0094298 | 0.0654164 | 0.885 |
| 13 | *rs1178977* | 7 | A | G | 0.8 | 0.0632518 | 0.0735156 | 0.39 |
| 14 | *rs17786744* | 8 | A | G | 0.59 | -0.124346 | 0.0594643 | 0.037 |
| 15 | *rs2941484* | 8 | T | C | 0.45 | 0.0867096 | 0.0589942 | 0.142 |
| 16 | *rs10821905* | 10 | A | G | 0.18 | -0.0987278 | 0.0764658 | 0.197 |
| 17 | *rs1171614* | 10 | T | C | 0.23 | 0.123703 | 0.069313 | 0.074 |
| 18 | *rs2078267* | 11 | T | C | 0.55 | 0.0883851 | 0.05863 | 0.132 |
| 19 | *rs478607* | 11 | A | G | 0.85 | 0.0895989 | 0.0811251 | 0.269 |
| 20 | *rs3741414* | 12 | T | C | 0.24 | -0.0903626 | 0.0681517 | 0.185 |
| 21 | *rs653178* | 12 | T | C | 0.52 | -0.0095555 | 0.0584341 | 0.87 |
| 22 | *rs1394125* | 15 | A | G | 0.36 | -0.0596677 | 0.0607813 | 0.326 |
| 23 | *rs6598541* | 15 | A | G | 0.36 | -0.0018031 | 0.0611253 | 0.976 |
| 24 | *rs7188445* | 16 | A | G | 0.33 | 0.0318968 | 0.0623063 | 0.609 |
| 25 | *rs7193778* | 16 | T | C | 0.85 | 0.0132215 | 0.082143 | 0.872 |
| 26 | *rs7224610* | 17 | A | C | 0.6 | 0.0288651 | 0.0600487 | 0.631 |

SNP: SNP number; Chr: chromosome; EA: effect allele; OA: other allele; EAF: effect allele frequency; G: genetic variant or SNP, Y: outcome (cancer in this case); GY: beta for the SNP-cancer association; SE-GY: standard error of GY; *p*: p-value of GY.

^Estimates are adjusted for age, sex and first principal component. SNP-cancer association analyses were done after excluding controls.

**Table S25: The association estimates of the 26 SNPs for urate with gastric cancer in the UK-Biobank cohort**

|  | SNP | Chr | EA | OA | EAF | GY^ | SE-GY | *p* |
| --- | --- | --- | --- | --- | --- | --- | --- | --- |
| 1 | *rs11264341* | 1 | T | C | 0.43 | 0.0493737 | 0.04142 | 0.233 |
| 2 | *rs1471633* | 1 | A | C | 0.46 | -0.0129679 | 0.0411189 | 0.752 |
| 3 | *rs1260326* | 2 | T | C | 0.4 | -0.0447251 | 0.0419132 | 0.286 |
| 4 | *rs17050272* | 2 | A | G | 0.41 | 0.0478248 | 0.0416897 | 0.251 |
| 5 | *rs6770152* | 3 | T | G | 0.58 | 0.0157418 | 0.0434323 | 0.717 |
| 6 | *rs12498742* | 4 | A | G | 0.77 | 0.0657873 | 0.0486288 | 0.176 |
| 7 | *rs2231142* | 4 | T | G | 0.11 | 0.135012 | 0.0641224 | 0.035 |
| 8 | *rs17632159* | 5 | C | G | 0.3 | -0.0585164 | 0.0445821 | 0.189 |
| 9 | *rs1165151* | 6 | T | G | 0.45 | 0.03386 | 0.0412111 | 0.411 |
| 10 | *rs675209* | 6 | T | C | 0.27 | -0.0462202 | 0.0462473 | 0.318 |
| 11 | *rs729761* | 6 | T | G | 0.29 | -0.0135494 | 0.0457052 | 0.767 |
| 12 | *rs10480300* | 7 | T | C | 0.27 | 0.0583149 | 0.0460002 | 0.205 |
| 13 | *rs1178977* | 7 | A | G | 0.8 | 0.00635303 | 0.0515263 | 0.902 |
| 14 | *rs17786744* | 8 | A | G | 0.59 | -0.0474304 | 0.041771 | 0.256 |
| 15 | *rs2941484* | 8 | T | C | 0.45 | 0.00659176 | 0.0414914 | 0.874 |
| 16 | *rs10821905* | 10 | A | G | 0.18 | 0.0204743 | 0.0534606 | 0.702 |
| 17 | *rs1171614* | 10 | T | C | 0.23 | 0.0878629 | 0.0486846 | 0.071 |
| 18 | *rs2078267* | 11 | T | C | 0.55 | 0.0351306 | 0.0411342 | 0.393 |
| 19 | *rs478607* | 11 | A | G | 0.85 | 0.00625879 | 0.0570411 | 0.913 |
| 20 | *rs3741414* | 12 | T | C | 0.24 | 0.0606133 | 0.047814 | 0.205 |
| 21 | *rs653178* | 12 | T | C | 0.52 | 0.0452538 | 0.0410345 | 0.27 |
| 22 | *rs1394125* | 15 | A | G | 0.36 | 0.0277236 | 0.0426754 | 0.516 |
| 23 | *rs6598541* | 15 | A | G | 0.36 | -0.0266668 | 0.0429041 | 0.534 |
| 24 | *rs7188445* | 16 | A | G | 0.33 | 0.00154779 | 0.0436978 | 0.972 |
| 25 | *rs7193778* | 16 | T | C | 0.85 | -0.0834278 | 0.0574108 | 0.146 |
| 26 | *rs7224610* | 17 | A | C | 0.6 | -0.0082339 | 0.0422171 | 0.845 |

SNP: SNP number; Chr: chromosome; EA: effect allele; OA: other allele; EAF: effect allele frequency; G: genetic variant or SNP, Y: outcome (cancer in this case); GY: beta for the SNP-cancer association; SE-GY: standard error of GY; *p*: p-value of GY.

^Estimates are adjusted for age, sex and first principal component. SNP-cancer association analyses were done after excluding controls.

**Table S26: The association estimates of the 26 SNPs for urate with hepatic cancer in the UK-Biobank cohort**

|  | SNP | Chr | EA | OA | EAF | GY^ | SE-GY | *p* |
| --- | --- | --- | --- | --- | --- | --- | --- | --- |
| 1 | *rs11264341* | 1 | T | C | 0.43 | -0.138817 | 0.0649915 | 0.033 |
| 2 | *rs1471633* | 1 | A | C | 0.46 | 0.0934926 | 0.0644691 | 0.147 |
| 3 | *rs1260326* | 2 | T | C | 0.4 | -0.0170659 | 0.0657051 | 0.795 |
| 4 | *rs17050272* | 2 | A | G | 0.41 | -0.0471308 | 0.0653789 | 0.471 |
| 5 | *rs6770152* | 3 | T | G | 0.58 | 0.087375 | 0.0680351 | 0.199 |
| 6 | *rs12498742* | 4 | A | G | 0.77 | -0.0014903 | 0.07613 | 0.984 |
| 7 | *rs2231142* | 4 | T | G | 0.11 | 0.119685 | 0.100923 | 0.236 |
| 8 | *rs17632159* | 5 | C | G | 0.3 | -0.0577133 | 0.0699623 | 0.409 |
| 9 | *rs1165151* | 6 | T | G | 0.45 | -0.0330467 | 0.0646061 | 0.609 |
| 10 | *rs675209* | 6 | T | C | 0.27 | 9.0761E-05 | 0.0724357 | 0.999 |
| 11 | *rs729761* | 6 | T | G | 0.29 | -0.0909478 | 0.0715683 | 0.204 |
| 12 | *rs10480300* | 7 | T | C | 0.27 | -0.0578611 | 0.0719663 | 0.421 |
| 13 | *rs1178977* | 7 | A | G | 0.8 | -0.0614227 | 0.0809019 | 0.448 |
| 14 | *rs17786744* | 8 | A | G | 0.59 | -0.067183 | 0.0656544 | 0.306 |
| 15 | *rs2941484* | 8 | T | C | 0.45 | -0.0693831 | 0.0649989 | 0.286 |
| 16 | *rs10821905* | 10 | A | G | 0.18 | -0.0098332 | 0.0839386 | 0.907 |
| 17 | *rs1171614* | 10 | T | C | 0.23 | 0.0258793 | 0.0763426 | 0.735 |
| 18 | *rs2078267* | 11 | T | C | 0.55 | -0.0779862 | 0.0645124 | 0.227 |
| 19 | *rs478607* | 11 | A | G | 0.85 | 0.134637 | 0.0895584 | 0.133 |
| 20 | *rs3741414* | 12 | T | C | 0.24 | 0.0731873 | 0.0751826 | 0.33 |
| 21 | *rs653178* | 12 | T | C | 0.52 | 0.0927573 | 0.0643578 | 0.15 |
| 22 | *rs1394125* | 15 | A | G | 0.36 | 0.0172362 | 0.066859 | 0.797 |
| 23 | *rs6598541* | 15 | A | G | 0.36 | -0.0358362 | 0.067224 | 0.594 |
| 24 | *rs7188445* | 16 | A | G | 0.33 | 0.197309 | 0.0686039 | 0.004 |
| 25 | *rs7193778* | 16 | T | C | 0.85 | -0.0776846 | 0.0902 | 0.389 |
| 26 | *rs7224610* | 17 | A | C | 0.6 | 0.0501786 | 0.0660375 | 0.447 |

SNP: SNP number; Chr: chromosome; EA: effect allele; OA: other allele; EAF: effect allele frequency; G: genetic variant or SNP, Y: outcome (cancer in this case); GY: beta for the SNP-cancer association; SE-GY: standard error of GY; *p*: p-value of GY.

^Estimates are adjusted for age, sex and first principal component. SNP-cancer association analyses were done after excluding controls.

**Table S27: The association estimates of the 26 SNPs for urate with renal cancer in the UK-Biobank cohort**

|  | SNP | Chr | EA | OA | EAF | GY^ | SE-GY | *p* |
| --- | --- | --- | --- | --- | --- | --- | --- | --- |
| 1 | *rs11264341* | 1 | T | C | 0.43 | 0.0482911 | 0.0407233 | 0.236 |
| 2 | *rs1471633* | 1 | A | C | 0.46 | 0.0158273 | 0.0404301 | 0.695 |
| 3 | *rs1260326* | 2 | T | C | 0.4 | -0.0105388 | 0.041227 | 0.798 |
| 4 | *rs17050272* | 2 | A | G | 0.41 | 0.00105173 | 0.0409721 | 0.98 |
| 5 | *rs6770152* | 3 | T | G | 0.58 | 0.00104742 | 0.0427312 | 0.98 |
| 6 | *rs12498742* | 4 | A | G | 0.77 | -0.0383826 | 0.0477258 | 0.421 |
| 7 | *rs2231142* | 4 | T | G | 0.11 | -0.095564 | 0.063461 | 0.132 |
| 8 | *rs17632159* | 5 | C | G | 0.3 | -0.0030301 | 0.0439407 | 0.945 |
| 9 | *rs1165151* | 6 | T | G | 0.45 | -0.0293611 | 0.0405218 | 0.469 |
| 10 | *rs675209* | 6 | T | C | 0.27 | 0.0646995 | 0.0454755 | 0.155 |
| 11 | *rs729761* | 6 | T | G | 0.29 | -0.0147553 | 0.0449357 | 0.743 |
| 12 | *rs10480300* | 7 | T | C | 0.27 | -0.0135677 | 0.0452713 | 0.764 |
| 13 | *rs1178977* | 7 | A | G | 0.8 | 0.0327072 | 0.0508108 | 0.52 |
| 14 | *rs17786744* | 8 | A | G | 0.59 | -0.0219039 | 0.0410946 | 0.594 |
| 15 | *rs2941484* | 8 | T | C | 0.45 | -0.0091608 | 0.0408222 | 0.822 |
| 16 | *rs10821905* | 10 | A | G | 0.18 | -0.0186474 | 0.0527401 | 0.724 |
| 17 | *rs1171614* | 10 | T | C | 0.23 | 0.00542633 | 0.047903 | 0.91 |
| 18 | *rs2078267* | 11 | T | C | 0.55 | -0.029248 | 0.040467 | 0.47 |
| 19 | *rs478607* | 11 | A | G | 0.85 | 0.150222 | 0.0560586 | 0.007 |
| 20 | *rs3741414* | 12 | T | C | 0.24 | -0.0134671 | 0.0469733 | 0.774 |
| 21 | *rs653178* | 12 | T | C | 0.52 | 0.0260457 | 0.0403606 | 0.519 |
| 22 | *rs1394125* | 15 | A | G | 0.36 | -0.0307473 | 0.0420022 | 0.464 |
| 23 | *rs6598541* | 15 | A | G | 0.36 | 0.0446463 | 0.0422106 | 0.29 |
| 24 | *rs7188445* | 16 | A | G | 0.33 | 0.0370081 | 0.0429286 | 0.389 |
| 25 | *rs7193778* | 16 | T | C | 0.85 | 0.0259711 | 0.0566608 | 0.647 |
| 26 | *rs7224610* | 17 | A | C | 0.6 | -0.0128206 | 0.0415007 | 0.757 |

SNP: SNP number; Chr: chromosome; EA: effect allele; OA: other allele; EAF: effect allele frequency; G: genetic variant or SNP, Y: outcome (cancer in this case); GY: beta for the SNP-cancer association; SE-GY: standard error of GY; *p*: p-value of GY.

^Estimates are adjusted for age, sex and first principal component. SNP-cancer association analyses were done after excluding controls.

**Table S28: The association estimates of the 26 SNPs for urate with lung cancer in the UK-Biobank cohort**

|  | SNP | Chr | EA | OA | EAF | GY^ | SE-GY | *p* |
| --- | --- | --- | --- | --- | --- | --- | --- | --- |
| 1 | *rs11264341* | 1 | T | C | 0.43 | 0.0567864 | 0.0282909 | 0.045 |
| 2 | *rs1471633* | 1 | A | C | 0.46 | 0.0256349 | 0.02807 | 0.361 |
| 3 | *rs1260326* | 2 | T | C | 0.4 | -0.0264675 | 0.0286108 | 0.355 |
| 4 | *rs17050272* | 2 | A | G | 0.41 | -0.0037085 | 0.0284835 | 0.896 |
| 5 | *rs6770152* | 3 | T | G | 0.58 | -0.0158941 | 0.02959 | 0.591 |
| 6 | *rs12498742* | 4 | A | G | 0.77 | -0.0458215 | 0.0331703 | 0.167 |
| 7 | *rs2231142* | 4 | T | G | 0.11 | -0.0768901 | 0.0438082 | 0.079 |
| 8 | *rs17632159* | 5 | C | G | 0.3 | -0.018428 | 0.030435 | 0.545 |
| 9 | *rs1165151* | 6 | T | G | 0.45 | 0.0385538 | 0.0281246 | 0.17 |
| 10 | *rs675209* | 6 | T | C | 0.27 | 0.0533537 | 0.0315347 | 0.091 |
| 11 | *rs729761* | 6 | T | G | 0.29 | 0.00257797 | 0.0311356 | 0.934 |
| 12 | *rs10480300* | 7 | T | C | 0.27 | 0.0176198 | 0.0313517 | 0.574 |
| 13 | *rs1178977* | 7 | A | G | 0.8 | -0.0281266 | 0.0351451 | 0.424 |
| 14 | *rs17786744* | 8 | A | G | 0.59 | 0.01002 | 0.0285344 | 0.725 |
| 15 | *rs2941484* | 8 | T | C | 0.45 | 0.0153774 | 0.0283115 | 0.587 |
| 16 | *rs10821905* | 10 | A | G | 0.18 | 0.0592263 | 0.0364927 | 0.105 |
| 17 | *rs1171614* | 10 | T | C | 0.23 | 0.00697656 | 0.0332552 | 0.834 |
| 18 | *rs2078267* | 11 | T | C | 0.55 | 0.00034574 | 0.0280983 | 0.99 |
| 19 | *rs478607* | 11 | A | G | 0.85 | -0.0132543 | 0.0389506 | 0.734 |
| 20 | *rs3741414* | 12 | T | C | 0.24 | 0.0204087 | 0.0327111 | 0.533 |
| 21 | *rs653178* | 12 | T | C | 0.52 | -0.0040644 | 0.0279871 | 0.885 |
| 22 | *rs1394125* | 15 | A | G | 0.36 | -0.116681 | 0.0291308 | 6.19E-05 |
| 23 | *rs6598541* | 15 | A | G | 0.36 | -0.0597755 | 0.0293209 | 0.041 |
| 24 | *rs7188445* | 16 | A | G | 0.33 | -0.0255103 | 0.0298533 | 0.393 |
| 25 | *rs7193778* | 16 | T | C | 0.85 | -0.0350083 | 0.0392647 | 0.373 |
| 26 | *rs7224610* | 17 | A | C | 0.6 | -0.0202304 | 0.0288272 | 0.483 |

SNP: SNP number; Chr: chromosome; EA: effect allele; OA: other allele; EAF: effect allele frequency; G: genetic variant or SNP, Y: outcome (cancer in this case); GY: beta for the SNP-cancer association; SE-GY: standard error of GY; *p*: p-value of GY.

^Estimates are adjusted for age, sex and first principal component. SNP-cancer association analyses were done after excluding controls.

**Table S29: The association estimates of the 26 SNPs for urate with lymphatic and hematopoietic cancer in the UK-Biobank cohort**

|  | SNP | Chr | EA | OA | EAF | GY^ | SE-GY | *p* |
| --- | --- | --- | --- | --- | --- | --- | --- | --- |
| 1 | *rs11264341* | 1 | T | C | 0.43 | 0.00152829 | 0.014854 | 0.918 |
| 2 | *rs1471633* | 1 | A | C | 0.46 | -0.0034634 | 0.0147533 | 0.814 |
| 3 | *rs1260326* | 2 | T | C | 0.4 | -0.0293131 | 0.0150376 | 0.051 |
| 4 | *rs17050272* | 2 | A | G | 0.41 | 0.0265085 | 0.0149571 | 0.076 |
| 5 | *rs6770152* | 3 | T | G | 0.58 | 0.00603995 | 0.01557 | 0.698 |
| 6 | *rs12498742* | 4 | A | G | 0.77 | -0.0133435 | 0.0173973 | 0.443 |
| 7 | *rs2231142* | 4 | T | G | 0.11 | -0.0077337 | 0.0231338 | 0.738 |
| 8 | *rs17632159* | 5 | C | G | 0.3 | 0.0002107 | 0.0160164 | 0.99 |
| 9 | *rs1165151* | 6 | T | G | 0.45 | 0.00322101 | 0.0147807 | 0.827 |
| 10 | *rs675209* | 6 | T | C | 0.27 | 0.0290523 | 0.0165654 | 0.079 |
| 11 | *rs729761* | 6 | T | G | 0.29 | 0.0253976 | 0.0163833 | 0.121 |
| 12 | *rs10480300* | 7 | T | C | 0.27 | 0.0381005 | 0.0164836 | 0.021 |
| 13 | *rs1178977* | 7 | A | G | 0.8 | -0.0099856 | 0.0185023 | 0.589 |
| 14 | *rs17786744* | 8 | A | G | 0.59 | -0.0319412 | 0.0150048 | 0.033 |
| 15 | *rs2941484* | 8 | T | C | 0.45 | 0.0243124 | 0.0148718 | 0.102 |
| 16 | *rs10821905* | 10 | A | G | 0.18 | 0.0154483 | 0.0192251 | 0.422 |
| 17 | *rs1171614* | 10 | T | C | 0.23 | -0.0039726 | 0.0174747 | 0.82 |
| 18 | *rs2078267* | 11 | T | C | 0.55 | -0.0120105 | 0.0147774 | 0.416 |
| 19 | *rs478607* | 11 | A | G | 0.85 | -0.0117025 | 0.0204579 | 0.567 |
| 20 | *rs3741414* | 12 | T | C | 0.24 | 0.0100397 | 0.0171687 | 0.559 |
| 21 | *rs653178* | 12 | T | C | 0.52 | 0.0589451 | 0.0147092 | 6.10E-05 |
| 22 | *rs1394125* | 15 | A | G | 0.36 | 0.00344213 | 0.0152962 | 0.822 |
| 23 | *rs6598541* | 15 | A | G | 0.36 | 0.00956543 | 0.0154014 | 0.535 |
| 24 | *rs7188445* | 16 | A | G | 0.33 | -0.0228147 | 0.015692 | 0.146 |
| 25 | *rs7193778* | 16 | T | C | 0.85 | -0.0519027 | 0.0206858 | 0.012 |
| 26 | *rs7224610* | 17 | A | C | 0.6 | 0.0169003 | 0.0151607 | 0.265 |

SNP: SNP number; Chr: chromosome; EA: effect allele; OA: other allele; EAF: effect allele frequency; G: genetic variant or SNP, Y: outcome (cancer in this case); GY: beta for the SNP-cancer association; SE-GY: standard error of GY; *p*: p-value of GY.

^Estimates are adjusted for age, sex and first principal component. SNP-cancer association analyses were done after excluding controls.

**Table S30: The association estimates of the 26 SNPs for urate with pancreatic cancer in the UK-Biobank cohort**

|  | SNP | Chr | EA | OA | EAF | GY^ | SE-GY | *p* |
| --- | --- | --- | --- | --- | --- | --- | --- | --- |
| 1 | *rs11264341* | 1 | T | C | 0.43 | -0.116291 | 0.0496183 | 0.821 |
| 2 | *rs1471633* | 1 | A | C | 0.46 | -0.0569525 | 0.0492171 | 0.051 |
| 3 | *rs1260326* | 2 | T | C | 0.4 | -0.0702754 | 0.0501664 | 0.019 |
| 4 | *rs17050272* | 2 | A | G | 0.41 | -0.0983446 | 0.0498833 | 0.026 |
| 5 | *rs6770152* | 3 | T | G | 0.58 | 0.00186189 | 0.052026 | 0.633 |
| 6 | *rs12498742* | 4 | A | G | 0.77 | 0.0282765 | 0.0581318 | 0.916 |
| 7 | *rs2231142* | 4 | T | G | 0.11 | 0.015332 | 0.0773472 | 0.627 |
| 8 | *rs17632159* | 5 | C | G | 0.3 | -0.0297058 | 0.0534167 | 0.161 |
| 9 | *rs1165151* | 6 | T | G | 0.45 | -0.109984 | 0.0493157 | 0.879 |
| 10 | *rs675209* | 6 | T | C | 0.27 | 0.0661162 | 0.055293 | 0.247 |
| 11 | *rs729761* | 6 | T | G | 0.29 | 0.0778539 | 0.0548097 | 0.049 |
| 12 | *rs10480300* | 7 | T | C | 0.27 | -0.0124271 | 0.0549831 | 0.578 |
| 13 | *rs1178977* | 7 | A | G | 0.8 | -0.0064923 | 0.061791 | 0.648 |
| 14 | *rs17786744* | 8 | A | G | 0.59 | -0.0228268 | 0.050061 | 0.923 |
| 15 | *rs2941484* | 8 | T | C | 0.45 | 0.0449855 | 0.0496983 | 0.843 |
| 16 | *rs10821905* | 10 | A | G | 0.18 | -0.125183 | 0.0642501 | 0.365 |
| 17 | *rs1171614* | 10 | T | C | 0.23 | -0.0278507 | 0.0583454 | 0.663 |
| 18 | *rs2078267* | 11 | T | C | 0.55 | 0.00475839 | 0.049263 | 0.535 |
| 19 | *rs478607* | 11 | A | G | 0.85 | 0.0422727 | 0.0681897 | 0.399 |
| 20 | *rs3741414* | 12 | T | C | 0.24 | 0.0249529 | 0.057344 | 0.193 |
| 21 | *rs653178* | 12 | T | C | 0.52 | -0.0413498 | 0.0490939 | 0.232 |
| 22 | *rs1394125* | 15 | A | G | 0.36 | 0.00775193 | 0.0510796 | 0.971 |
| 23 | *rs6598541* | 15 | A | G | 0.36 | 0.0669744 | 0.0514428 | 0.675 |
| 24 | *rs7188445* | 16 | A | G | 0.33 | -0.0219719 | 0.0523401 | 0.076 |
| 25 | *rs7193778* | 16 | T | C | 0.85 | -0.122547 | 0.0691511 | 0.655 |
| 26 | *rs7224610* | 17 | A | C | 0.6 | -0.0226111 | 0.0505959 | 0.155 |

SNP: SNP number; Chr: chromosome; EA: effect allele; OA: other allele; EAF: effect allele frequency; G: genetic variant or SNP, Y: outcome (cancer in this case); GY: beta for the SNP-cancer association; SE-GY: standard error of GY; *p*: p-value of GY.

^Estimates are adjusted for age, sex and first principal component. SNP-cancer association analyses were done after excluding controls.

**Table S31: The association estimates of the 26 SNPs for urate with skin cancer in the UK-Biobank cohort**

|  | SNP | Chr | EA | OA | EAF | GY^ | SE-GY | *p* |
| --- | --- | --- | --- | --- | --- | --- | --- | --- |
| 1 | *rs11264341* | 1 | T | C | 0.43 | -0.0132534 | 0.0301476 | 0.66 |
| 2 | *rs1471633* | 1 | A | C | 0.46 | 0.012298 | 0.0299561 | 0.681 |
| 3 | *rs1260326* | 2 | T | C | 0.4 | 0.0507123 | 0.0305305 | 0.097 |
| 4 | *rs17050272* | 2 | A | G | 0.41 | -0.0296365 | 0.0303578 | 0.329 |
| 5 | *rs6770152* | 3 | T | G | 0.58 | 0.005594 | 0.0316384 | 0.86 |
| 6 | *rs12498742* | 4 | A | G | 0.77 | -0.0316504 | 0.035312 | 0.37 |
| 7 | *rs2231142* | 4 | T | G | 0.11 | -0.0084096 | 0.047026 | 0.858 |
| 8 | *rs17632159* | 5 | C | G | 0.3 | -0.015103 | 0.0325375 | 0.643 |
| 9 | *rs1165151* | 6 | T | G | 0.45 | -0.0295459 | 0.0300098 | 0.325 |
| 10 | *rs675209* | 6 | T | C | 0.27 | -0.0321185 | 0.0336396 | 0.34 |
| 11 | *rs729761* | 6 | T | G | 0.29 | -0.034244 | 0.0332941 | 0.304 |
| 12 | *rs10480300* | 7 | T | C | 0.27 | 0.105069 | 0.0335192 | 0.002 |
| 13 | *rs1178977* | 7 | A | G | 0.8 | 0.0494598 | 0.0375608 | 0.188 |
| 14 | *rs17786744* | 8 | A | G | 0.59 | -0.0034805 | 0.0304401 | 0.909 |
| 15 | *rs2941484* | 8 | T | C | 0.45 | -0.056802 | 0.0302004 | 0.06 |
| 16 | *rs10821905* | 10 | A | G | 0.18 | -0.016603 | 0.0390974 | 0.671 |
| 17 | *rs1171614* | 10 | T | C | 0.23 | 0.0534164 | 0.035466 | 0.132 |
| 18 | *rs2078267* | 11 | T | C | 0.55 | -0.0297481 | 0.0300008 | 0.321 |
| 19 | *rs478607* | 11 | A | G | 0.85 | 0.00092441 | 0.0414827 | 0.982 |
| 20 | *rs3741414* | 12 | T | C | 0.24 | -0.0733915 | 0.0347885 | 0.035 |
| 21 | *rs653178* | 12 | T | C | 0.52 | 0.057602 | 0.0298604 | 0.054 |
| 22 | *rs1394125* | 15 | A | G | 0.36 | -0.0132397 | 0.0310671 | 0.67 |
| 23 | *rs6598541* | 15 | A | G | 0.36 | 0.064992 | 0.031273 | 0.038 |
| 24 | *rs7188445* | 16 | A | G | 0.33 | 0.0108202 | 0.0318196 | 0.734 |
| 25 | *rs7193778* | 16 | T | C | 0.85 | -0.0010791 | 0.0420429 | 0.98 |
| 26 | *rs7224610* | 17 | A | C | 0.6 | -0.0189132 | 0.0307841 | 0.539 |

SNP: SNP number; Chr: chromosome; EA: effect allele; OA: other allele; EAF: effect allele frequency; G: genetic variant or SNP, Y: outcome (cancer in this case); GY: beta for the SNP-cancer association; SE-GY: standard error of GY; *p*: p-value of GY.

^Estimates are adjusted for age, sex and first principal component. SNP-cancer association analyses were done after excluding controls.

**Table S32: The association estimates of the 26 SNPs for urate with breast cancer in the UK-Biobank cohort**

|  | SNP | Chr | EA | OA | EAF | GY^ | SE-GY | *p* |
| --- | --- | --- | --- | --- | --- | --- | --- | --- |
| 1 | *rs11264341* | 1 | T | C | 0.43 | 0.0339365 | 0.0145429 | 0.02 |
| 2 | *rs1471633* | 1 | A | C | 0.46 | 0.016186 | 0.0144321 | 0.262 |
| 3 | *rs1260326* | 2 | T | C | 0.4 | -0.0160701 | 0.0147215 | 0.275 |
| 4 | *rs17050272* | 2 | A | G | 0.41 | -0.0061773 | 0.0146452 | 0.673 |
| 5 | *rs6770152* | 3 | T | G | 0.58 | 0.00115236 | 0.0152483 | 0.94 |
| 6 | *rs12498742* | 4 | A | G | 0.77 | 0.0011449 | 0.017017 | 0.946 |
| 7 | *rs2231142* | 4 | T | G | 0.11 | -0.0530077 | 0.0227263 | 0.02 |
| 8 | *rs17632159* | 5 | C | G | 0.3 | -0.0152987 | 0.0156742 | 0.329 |
| 9 | *rs1165151* | 6 | T | G | 0.45 | -0.0038493 | 0.0144672 | 0.79 |
| 10 | *rs675209* | 6 | T | C | 0.27 | -0.0231559 | 0.0161967 | 0.153 |
| 11 | *rs729761* | 6 | T | G | 0.29 | -0.0134652 | 0.0160505 | 0.402 |
| 12 | *rs10480300* | 7 | T | C | 0.27 | 0.0268811 | 0.0161282 | 0.096 |
| 13 | *rs1178977* | 7 | A | G | 0.8 | 0.0195769 | 0.0180909 | 0.279 |
| 14 | *rs17786744* | 8 | A | G | 0.59 | -0.0028033 | 0.0146874 | 0.849 |
| 15 | *rs2941484* | 8 | T | C | 0.45 | 0.0269707 | 0.0145613 | 0.064 |
| 16 | *rs10821905* | 10 | A | G | 0.18 | 0.00605839 | 0.0188382 | 0.748 |
| 17 | *rs1171614* | 10 | T | C | 0.23 | -0.0119937 | 0.0170911 | 0.483 |
| 18 | *rs2078267* | 11 | T | C | 0.55 | 0.015342 | 0.0144914 | 0.29 |
| 19 | *rs478607* | 11 | A | G | 0.85 | -0.0206202 | 0.0199853 | 0.302 |
| 20 | *rs3741414* | 12 | T | C | 0.24 | 0.031245 | 0.0167988 | 0.063 |
| 21 | *rs653178* | 12 | T | C | 0.52 | 0.055312 | 0.014376 | 1.19E-04 |
| 22 | *rs1394125* | 15 | A | G | 0.36 | 0.00975224 | 0.0149679 | 0.515 |
| 23 | *rs6598541* | 15 | A | G | 0.36 | 0.0308479 | 0.0150945 | 0.041 |
| 24 | *rs7188445* | 16 | A | G | 0.33 | -0.0128371 | 0.0153769 | 0.404 |
| 25 | *rs7193778* | 16 | T | C | 0.85 | -0.0519596 | 0.0203027 | 0.01 |
| 26 | *rs7224610* | 17 | A | C | 0.6 | 0.00353648 | 0.0148585 | 0.812 |

SNP: SNP number; Chr: chromosome; EA: effect allele; OA: other allele; EAF: effect allele frequency; G: genetic variant or SNP, Y: outcome (cancer in this case); GY: beta for the SNP-cancer association; SE-GY: standard error of GY; *p*: p-value of GY.

^Estimates are adjusted for age, sex and first principal component. SNP-cancer association analyses were done after excluding controls.

**Table S33: The association estimates of the 26 SNPs for urate with gynecological cancers in the UK-Biobank cohort**

|  | SNP | Chr | EA | OA | EAF | GY^ | SE-GY | *p* |
| --- | --- | --- | --- | --- | --- | --- | --- | --- |
| 1 | *rs11264341* | 1 | T | C | 0.43 | -0.0532007 | 0.0280619 | 0.058 |
| 2 | *rs1471633* | 1 | A | C | 0.46 | 0.019734 | 0.0278484 | 0.479 |
| 3 | *rs1260326* | 2 | T | C | 0.4 | -0.0141366 | 0.028401 | 0.619 |
| 4 | *rs17050272* | 2 | A | G | 0.41 | -0.0067409 | 0.0282729 | 0.812 |
| 5 | *rs6770152* | 3 | T | G | 0.58 | 0.0611636 | 0.0294431 | 0.038 |
| 6 | *rs12498742* | 4 | A | G | 0.77 | -0.017372 | 0.0328317 | 0.597 |
| 7 | *rs2231142* | 4 | T | G | 0.11 | -0.0496248 | 0.0436996 | 0.256 |
| 8 | *rs17632159* | 5 | C | G | 0.3 | -0.0135717 | 0.0302614 | 0.654 |
| 9 | *rs1165151* | 6 | T | G | 0.45 | 0.053074 | 0.0279024 | 0.057 |
| 10 | *rs675209* | 6 | T | C | 0.27 | 0.0171589 | 0.03124 | 0.583 |
| 11 | *rs729761* | 6 | T | G | 0.29 | 0.010903 | 0.0309661 | 0.725 |
| 12 | *rs10480300* | 7 | T | C | 0.27 | -0.0075009 | 0.0311222 | 0.81 |
| 13 | *rs1178977* | 7 | A | G | 0.8 | 0.00445343 | 0.034889 | 0.898 |
| 14 | *rs17786744* | 8 | A | G | 0.59 | 0.00122439 | 0.0283346 | 0.966 |
| 15 | *rs2941484* | 8 | T | C | 0.45 | 0.0165698 | 0.0280825 | 0.555 |
| 16 | *rs10821905* | 10 | A | G | 0.18 | -0.045298 | 0.0364035 | 0.213 |
| 17 | *rs1171614* | 10 | T | C | 0.23 | -0.0599029 | 0.0329747 | 0.069 |
| 18 | *rs2078267* | 11 | T | C | 0.55 | -0.0066049 | 0.0279599 | 0.813 |
| 19 | *rs478607* | 11 | A | G | 0.85 | 0.00082503 | 0.0385639 | 0.983 |
| 20 | *rs3741414* | 12 | T | C | 0.24 | -0.005324 | 0.0323978 | 0.869 |
| 21 | *rs653178* | 12 | T | C | 0.52 | 0.0327483 | 0.0277188 | 0.237 |
| 22 | *rs1394125* | 15 | A | G | 0.36 | 0.0049759 | 0.0288726 | 0.863 |
| 23 | *rs6598541* | 15 | A | G | 0.36 | -0.0051284 | 0.0291346 | 0.86 |
| 24 | *rs7188445* | 16 | A | G | 0.33 | -0.0225596 | 0.0296696 | 0.447 |
| 25 | *rs7193778* | 16 | T | C | 0.85 | -0.0412211 | 0.0391253 | 0.292 |
| 26 | *rs7224610* | 17 | A | C | 0.6 | 0.0284163 | 0.0286465 | 0.321 |

SNP: SNP number; Chr: chromosome; EA: effect allele; OA: other allele; EAF: effect allele frequency; G: genetic variant or SNP, Y: outcome (cancer in this case); GY: beta for the SNP-cancer association; SE-GY: standard error of GY; *p*: p-value of GY.

^Estimates are adjusted for age, sex and first principal component. SNP-cancer association analyses were done after excluding controls.

**Table S34: The association estimates of the 26 SNPs for urate with prostate cancer in the UK-Biobank cohort**

|  | SNP | Chr | EA | OA | EAF | GY^ | SE-GY | *p* |
| --- | --- | --- | --- | --- | --- | --- | --- | --- |
| 1 | *rs11264341* | 1 | T | C | 0.43 | 0.0141908 | 0.0184193 | 0.252 |
| 2 | *rs1471633* | 1 | A | C | 0.46 | -0.0179301 | 0.0182801 | 0.717 |
| 3 | *rs1260326* | 2 | T | C | 0.4 | -0.0051067 | 0.0186354 | 0.441 |
| 4 | *rs17050272* | 2 | A | G | 0.41 | -0.0016628 | 0.0185039 | 0.644 |
| 5 | *rs6770152* | 3 | T | G | 0.58 | -0.0163893 | 0.0192746 | 0.158 |
| 6 | *rs12498742* | 4 | A | G | 0.77 | -0.0051854 | 0.0215874 | 0.387 |
| 7 | *rs2231142* | 4 | T | G | 0.11 | -0.0260415 | 0.0287398 | 0.81 |
| 8 | *rs17632159* | 5 | C | G | 0.3 | -0.013901 | 0.0198219 | 0.784 |
| 9 | *rs1165151* | 6 | T | G | 0.45 | -0.0084744 | 0.0183315 | 0.264 |
| 10 | *rs675209* | 6 | T | C | 0.27 | -0.0013849 | 0.020579 | 0.327 |
| 11 | *rs729761* | 6 | T | G | 0.29 | 0.00589699 | 0.0202883 | 0.928 |
| 12 | *rs10480300* | 7 | T | C | 0.27 | 0.0234225 | 0.0204386 | 0.483 |
| 13 | *rs1178977* | 7 | A | G | 0.8 | 0.0198997 | 0.0229819 | 0.061 |
| 14 | *rs17786744* | 8 | A | G | 0.59 | -0.0348108 | 0.0185579 | 0.227 |
| 15 | *rs2941484* | 8 | T | C | 0.45 | -0.0099068 | 0.0184603 | 0.365 |
| 16 | *rs10821905* | 10 | A | G | 0.18 | -0.0086263 | 0.0237772 | 0.592 |
| 17 | *rs1171614* | 10 | T | C | 0.23 | 0.0306369 | 0.0216753 | 0.104 |
| 18 | *rs2078267* | 11 | T | C | 0.55 | -0.0220424 | 0.0182544 | 0.926 |
| 19 | *rs478607* | 11 | A | G | 0.85 | 0.00235266 | 0.0253732 | 0.773 |
| 20 | *rs3741414* | 12 | T | C | 0.24 | -0.034557 | 0.0212837 | 0.7 |
| 21 | *rs653178* | 12 | T | C | 0.52 | -0.0052659 | 0.018244 | 0.946 |
| 22 | *rs1394125* | 15 | A | G | 0.36 | 0.0212029 | 0.0189863 | 0.395 |
| 23 | *rs6598541* | 15 | A | G | 0.36 | -0.0073332 | 0.0190537 | 0.326 |
| 24 | *rs7188445* | 16 | A | G | 0.33 | 0.0190304 | 0.0193823 | 0.194 |
| 25 | *rs7193778* | 16 | T | C | 0.85 | -0.033285 | 0.0256088 | 0.618 |
| 26 | *rs7224610* | 17 | A | C | 0.6 | -0.0093578 | 0.0187632 | 0.771 |

SNP: SNP number; Chr: chromosome; EA: effect allele; OA: other allele; EAF: effect allele frequency; G: genetic variant or SNP, Y: outcome (cancer in this case); GY: beta for the SNP-cancer association; SE-GY: standard error of GY; *p*: p-value of GY.

^Estimates are adjusted for age, sex and first principal component. SNP-cancer association analyses were done after excluding controls.

**Table S35: The association estimates of the 26 SNPs for urate with all-cause cancer in the UK-Biobank cohort**

|  | SNP | Chr | EA | OA | EAF | GY^ | SE-GY | *p* |
| --- | --- | --- | --- | --- | --- | --- | --- | --- |
| 1 | *rs11264341* | 1 | T | C | 0.43 | 0.00657421 | 0.00794928 | 0.013 |
| 2 | *rs1471633* | 1 | A | C | 0.46 | -0.0001384 | 0.00789576 | 0.141 |
| 3 | *rs1260326* | 2 | T | C | 0.4 | -0.0077912 | 0.00804917 | 0.408 |
| 4 | *rs17050272* | 2 | A | G | 0.41 | -0.0043466 | 0.00800426 | 0.557 |
| 5 | *rs6770152* | 3 | T | G | 0.58 | 0.0149524 | 0.00834099 | 0.794 |
| 6 | *rs12498742* | 4 | A | G | 0.77 | -0.011096 | 0.00931182 | 0.856 |
| 7 | *rs2231142* | 4 | T | G | 0.11 | -0.0353706 | 0.0124007 | 0.233 |
| 8 | *rs17632159* | 5 | C | G | 0.3 | -0.0147381 | 0.00857488 | 0.333 |
| 9 | *rs1165151* | 6 | T | G | 0.45 | 0.00464205 | 0.00791341 | 0.734 |
| 10 | *rs675209* | 6 | T | C | 0.27 | 0.00037591 | 0.00886725 | 0.986 |
| 11 | *rs729761* | 6 | T | G | 0.29 | -0.0013197 | 0.00877096 | 0.587 |
| 12 | *rs10480300* | 7 | T | C | 0.27 | 0.0219708 | 0.00882193 | 0.086 |
| 13 | *rs1178977* | 7 | A | G | 0.8 | -0.0018021 | 0.00989756 | 0.004 |
| 14 | *rs17786744* | 8 | A | G | 0.59 | -0.0234408 | 0.00802807 | 0.781 |
| 15 | *rs2941484* | 8 | T | C | 0.45 | 0.00743504 | 0.00796404 | 0.004 |
| 16 | *rs10821905* | 10 | A | G | 0.18 | -0.0151794 | 0.0103041 | 0.351 |
| 17 | *rs1171614* | 10 | T | C | 0.23 | 0.00244047 | 0.00935105 | 0.444 |
| 18 | *rs2078267* | 11 | T | C | 0.55 | 0.00219449 | 0.00790731 | 0.946 |
| 19 | *rs478607* | 11 | A | G | 0.85 | -0.0007424 | 0.0109455 | 2.78E-05 |
| 20 | *rs3741414* | 12 | T | C | 0.24 | 0.00702542 | 0.00918756 | 0.034 |
| 21 | *rs653178* | 12 | T | C | 0.52 | 0.0329874 | 0.00787135 | 0.966 |
| 22 | *rs1394125* | 15 | A | G | 0.36 | -0.0027791 | 0.00818998 | 0.073 |
| 23 | *rs6598541* | 15 | A | G | 0.36 | 0.0174767 | 0.00824223 | 0.694 |
| 24 | *rs7188445* | 16 | A | G | 0.33 | -0.0033104 | 0.0084007 | 0.005 |
| 25 | *rs7193778* | 16 | T | C | 0.85 | -0.0311278 | 0.0110626 | 0.965 |
| 26 | *rs7224610* | 17 | A | C | 0.6 | 0.00035729 | 0.00811159 | 0.88 |

SNP: SNP number; Chr: chromosome; EA: effect allele; OA: other allele; EAF: effect allele frequency; G: genetic variant or SNP, Y: outcome (cancer in this case); GY: beta for the SNP-cancer association; SE-GY: standard error of GY; *p*: p-value of GY.

^Estimates are adjusted for age, sex and first principal component. SNP-cancer association analyses were done after excluding controls.

**Table S36: Power calculations for MR analyses of the effect of serum urate on cancer risk**

| Sr # | Cancer type | OR from observational analysis in MDCS-MPP | Type I error rate | UK-Biobank | | | | MDCS-MPP | | | |
| --- | --- | --- | --- | --- | --- | --- | --- | --- | --- | --- | --- |
| **% of variance in urate explained by 26 SNPs in GUGC** | **Sample size** | **Proportion of cases in UK-Biobank** | **Power (%)** | **% of variance in urate explained by 26 SNPs in MDCS-MPP** | **Sample size** | **Proportion of cases** | **Power (%)** |
| 1 | Bladder | 1.08 | 0.05 | 5.8 | 333000 | 0.0067 | 15 | 5.9 | 12454 | 0.0414 | 7 |
| 2 | Colorectal | 1.18 | 0.05 | 5.8 | 335243 | 0.0134 | 82 | 5.9 | 12729 | 0.0621 | 22 |
| 3 | Brain | 1.16 | 0.05 | 5.8 | 331344 | 0.0018 | 16 | 5.9 | 12054 | 0.0096 | 7 |
| 4 | Gastric | 0.92 | 0.05 | 5.8 | 331955 | 0.0036 | 10 | 5.9 | 12114 | 0.0145 | 6 |
| 5 | Hepatic | 1.01 | 0.05 | 5.8 | 331241 | 0.0015 | 5 | 5.9 | 11987 | 0.0041 | 5 |
| 6 | Renal | 1.01 | 0.05 | 5.8 | 331994 | 0.0037 | 5 | 5.9 | 12115 | 0.0146 | 5 |
| 7 | Lung | 0.94 | 0.05 | 5.8 | 333345 | 0.0078 | 11 | 5.9 | 12483 | 0.0437 | 6 |
| 8 | Lymphatic and hematopoietic | 1.02 | 0.05 | 5.8 | 340332 | 0.0281 | 7 | 5.9 | 12399 | 0.0372 | 5 |
| 9 | Pancreatic | 1.09 | 0.05 | 5.8 | 331590 | 0.0025 | 10 | 5.9 | 12060 | 0.0101 | 6 |
| 10 | Skin | 1.03 | 0.05 | 5.8 | 333019 | 0.0068 | 6 | 5.9 | 12331 | 0.0319 | 5 |
| 11 | Breast | 1.02 | 0.05 | 5.8 | 189222 | 0.0543 | 8 | 5.9 | 5364 | 0.1359 | 5 |
| 12 | Gynecological | 1.15 | 0.05 | 5.8 | 181590 | 0.0145 | 45 | 5.9 | 5000 | 0.0736 | 10 |
| 13 | Prostate | 1.08 | 0.05 | 5.8 | 158281 | 0.0409 | 33 | 5.9 | 8827 | 0.1723 | 10 |
| 14 | All-cause | 1.06 | 0.05 | 5.8 | 367570 | 0.1002 | 74 | 5.9 | 17597 | 0.3216 | 14 |

MDCS-MPP: Malmö Diet Cancer Study and Malmö Preventive Project, SNP: single neucclotide polymorphism

**Supplementary figures**

**Figure S1 (a to n):** Forest plots of MR estimates for the 26-SNPs, inverse variance weighted (IVW), weighted median and MR-Egger estimates for urate-cancer risk relationship in two-sample MR setting.


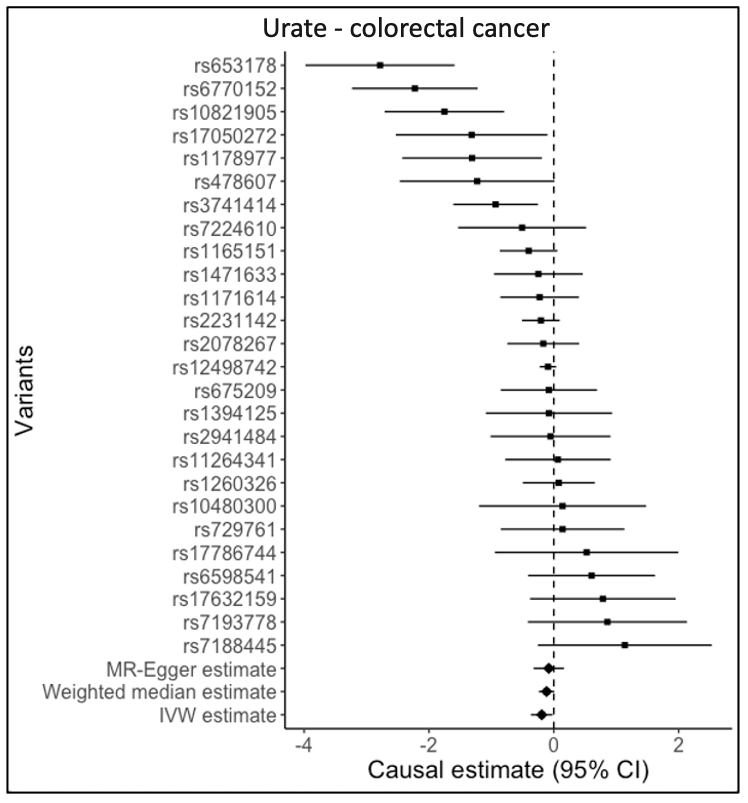

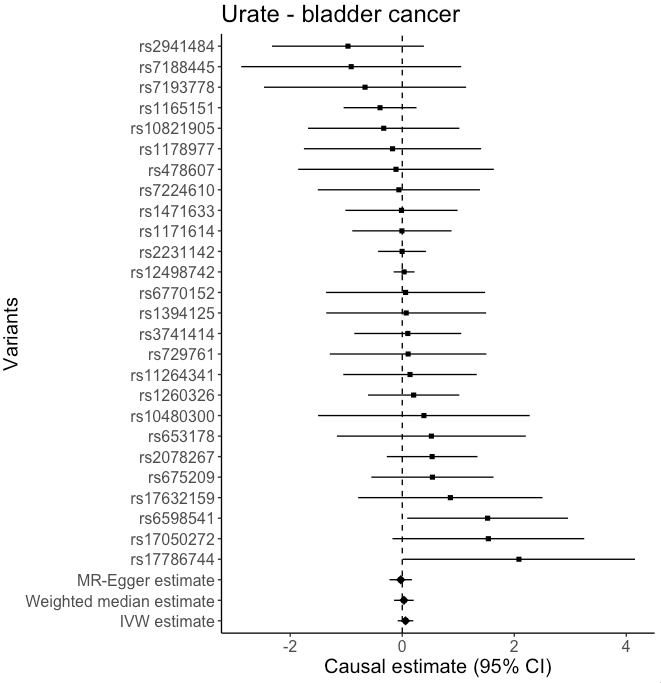


a) b)


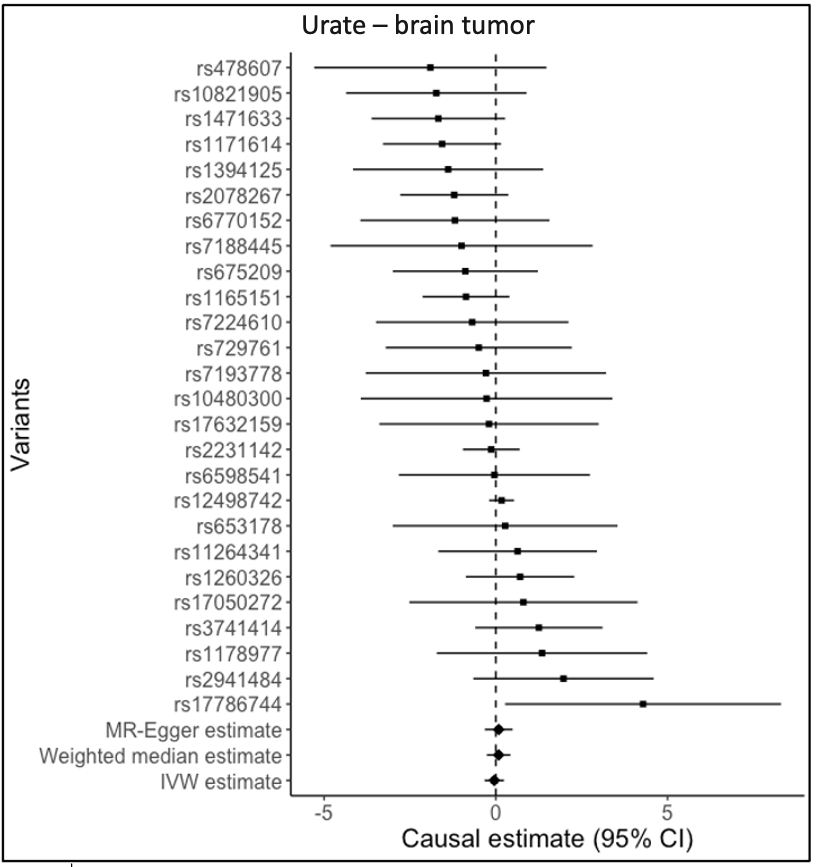

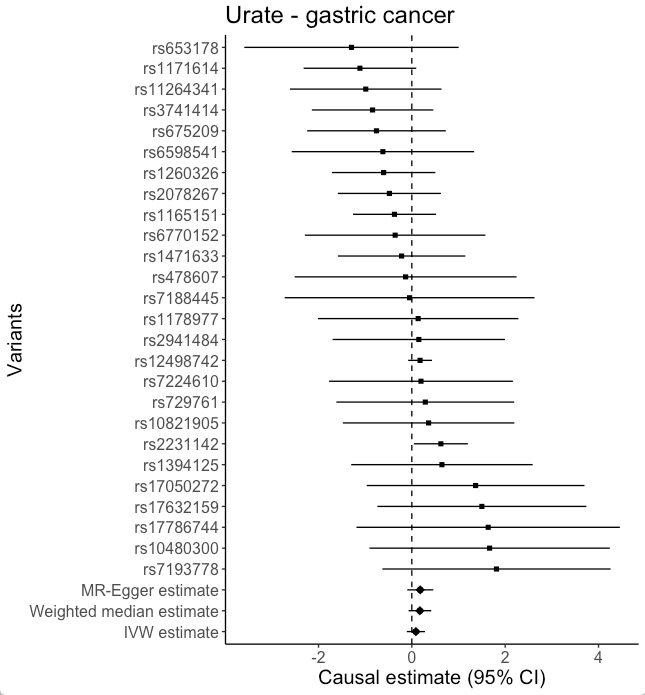


c) d)


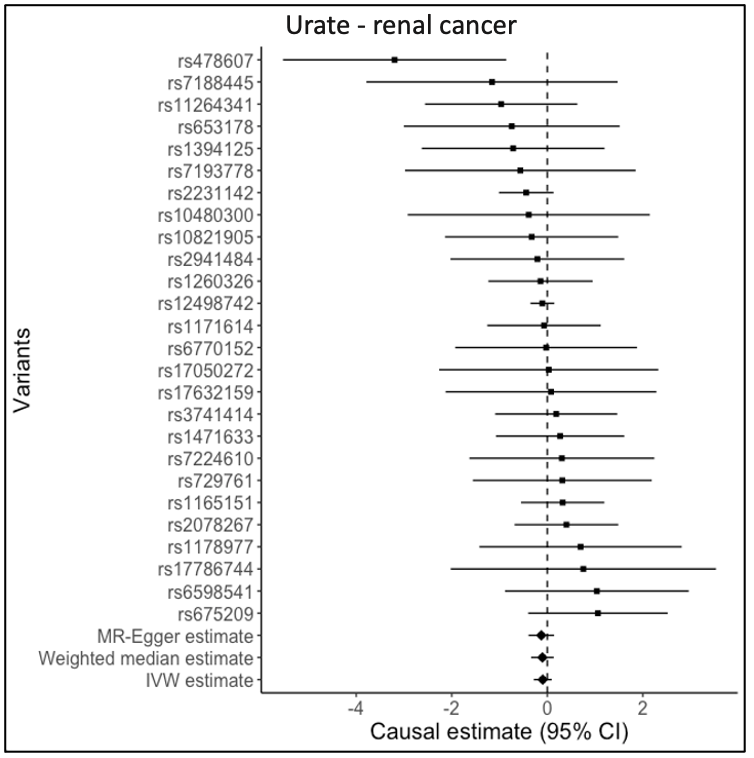


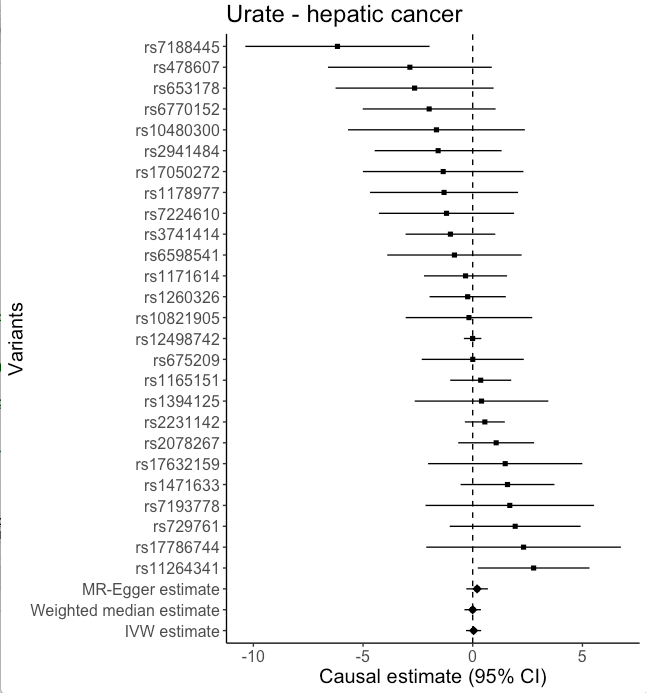


e) f)


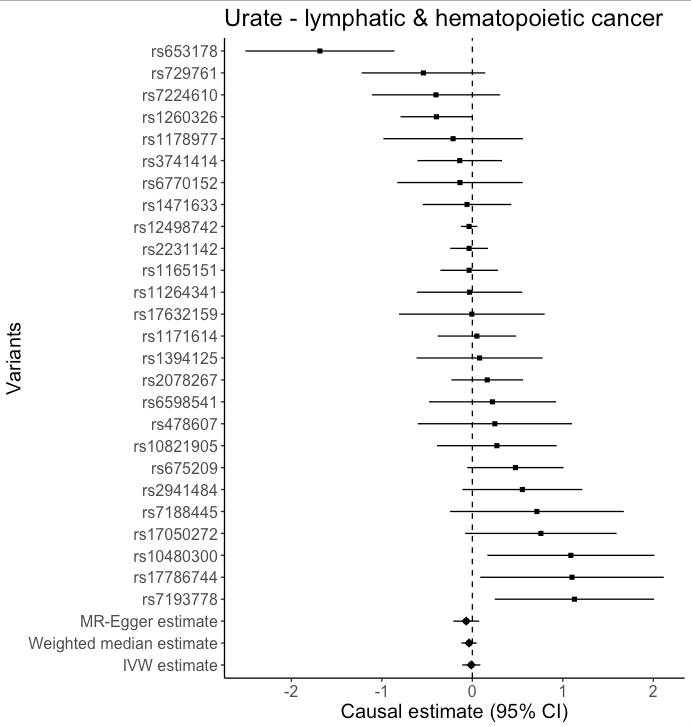

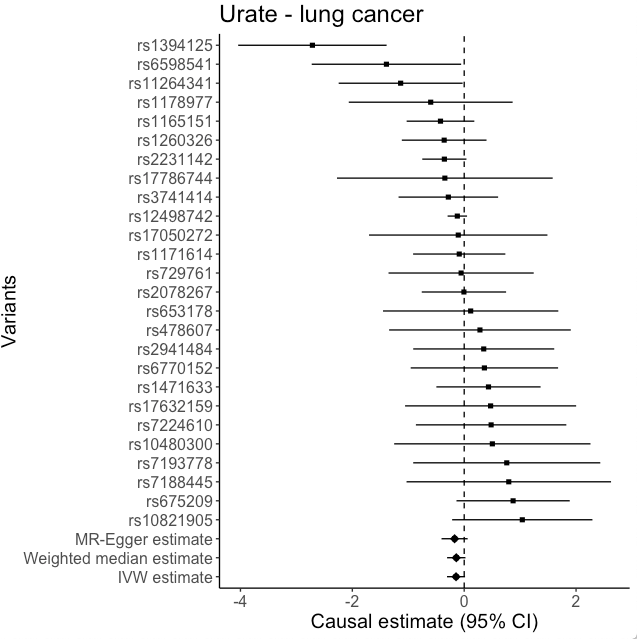


g) h)


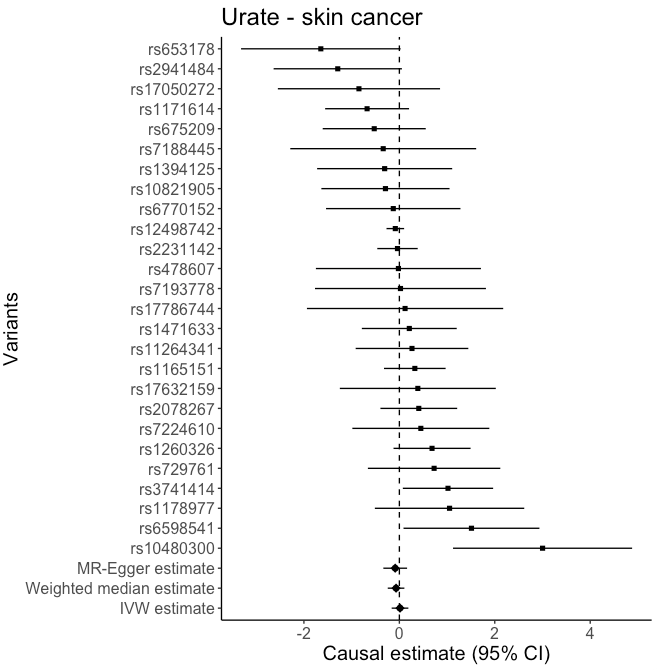

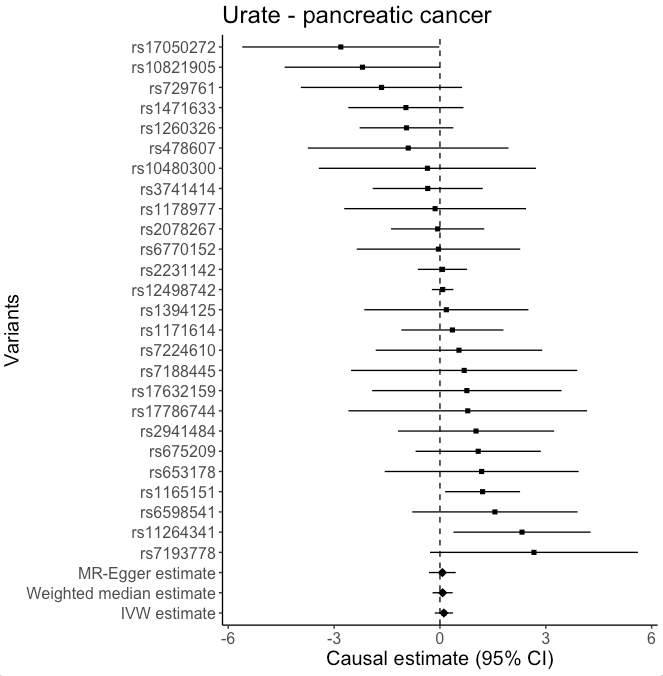


i) j)


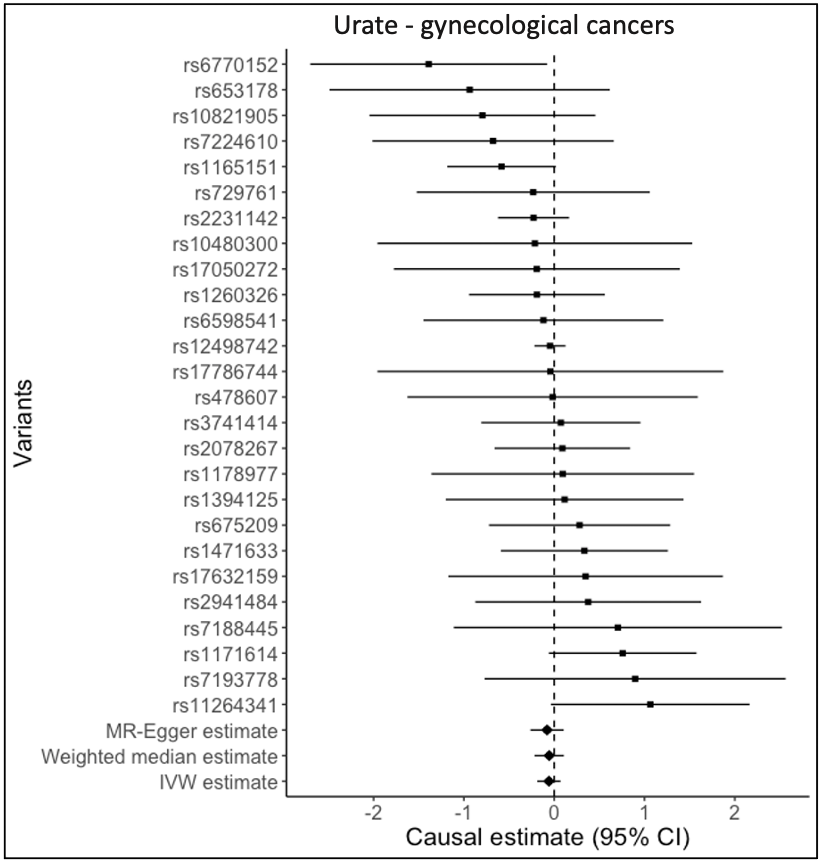

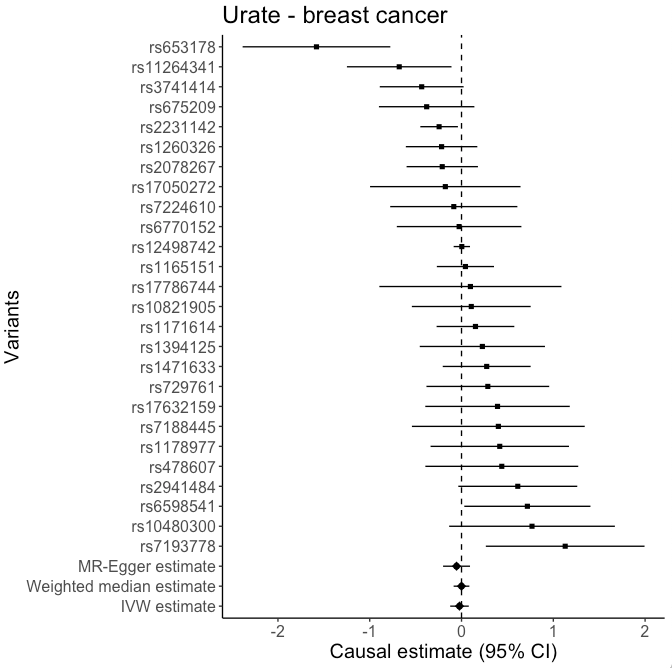


k) l)


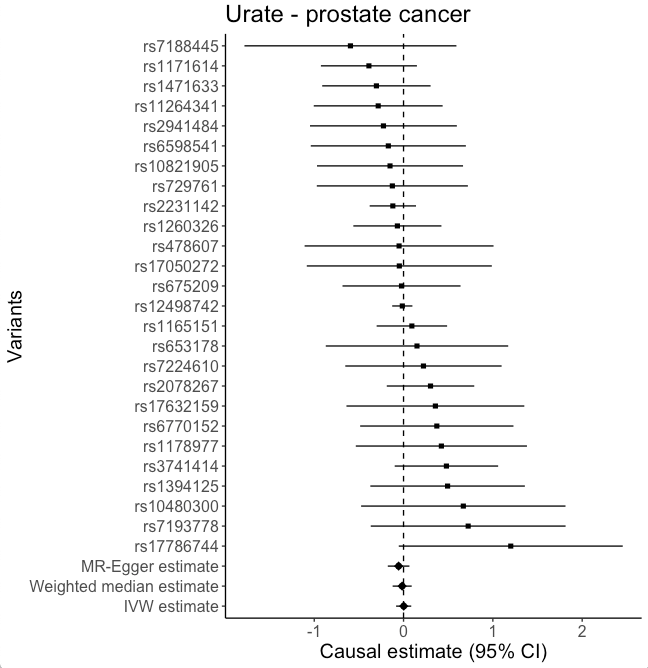

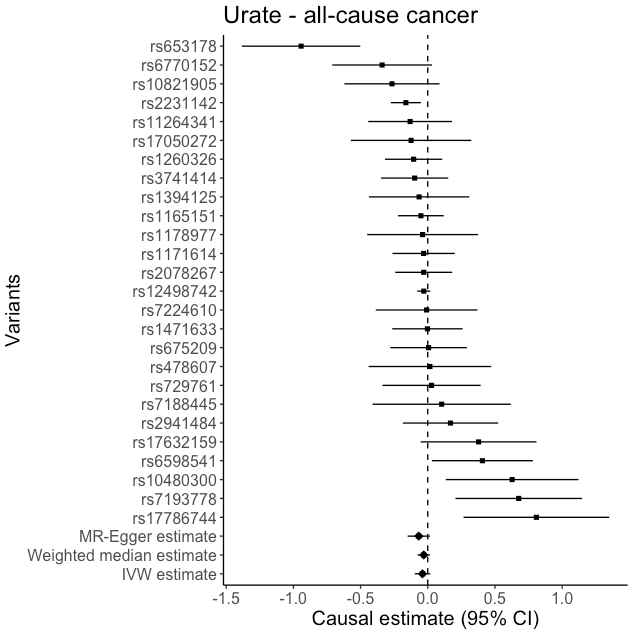


m) n)

**Figure S2 (a to n):** Forest plots of leave-one-out analyses for the estimated MR effects of serum urate levels on the risk of different cancer types
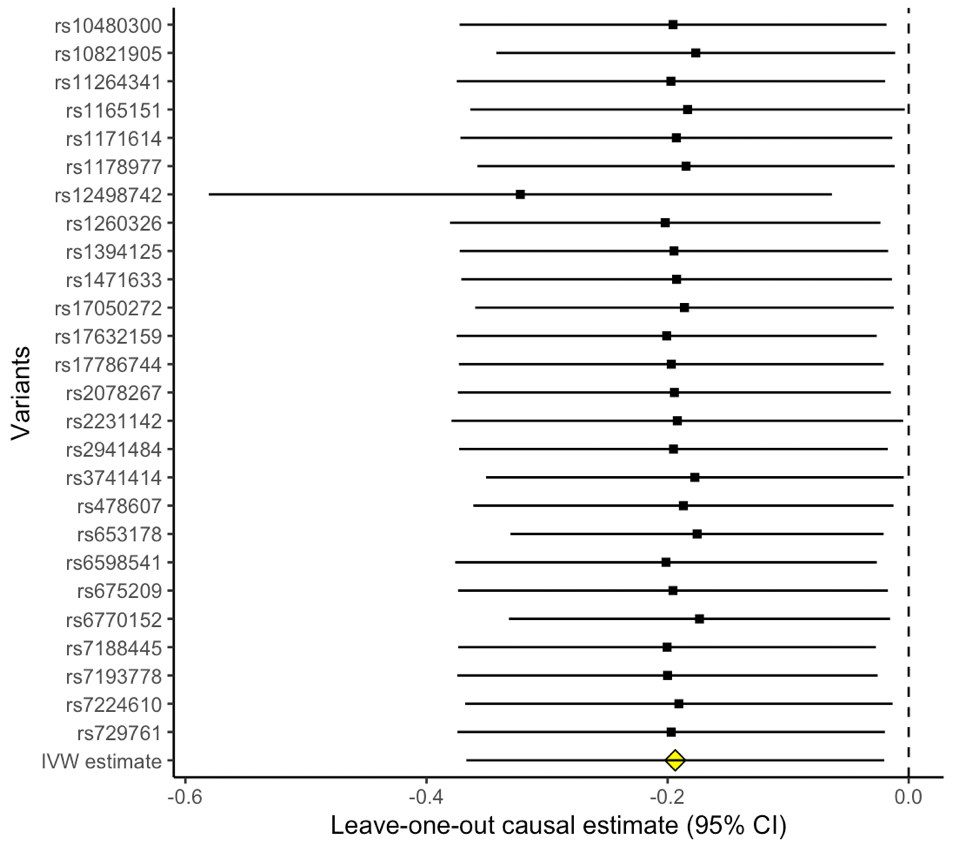

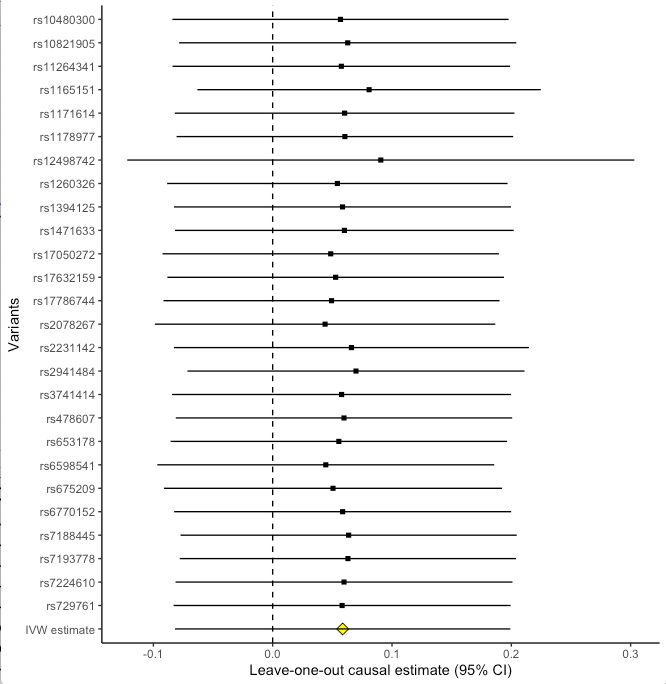


a) Urate - bladder cancer b) Urate - colorectal cancer


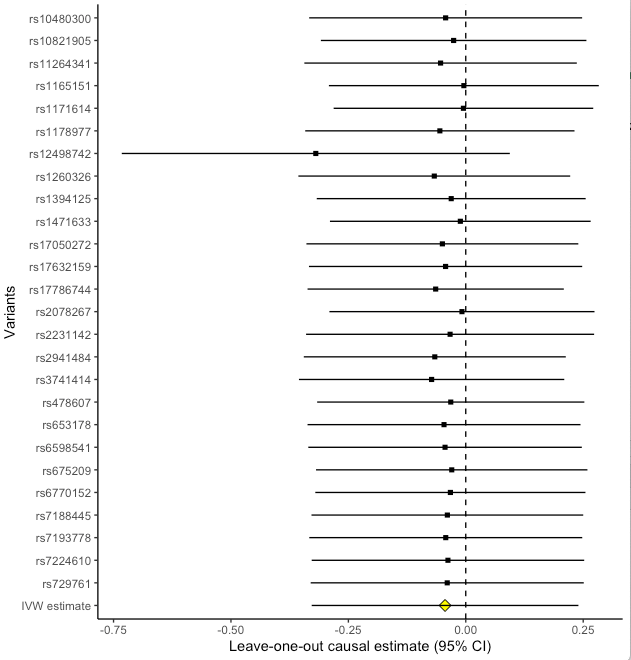

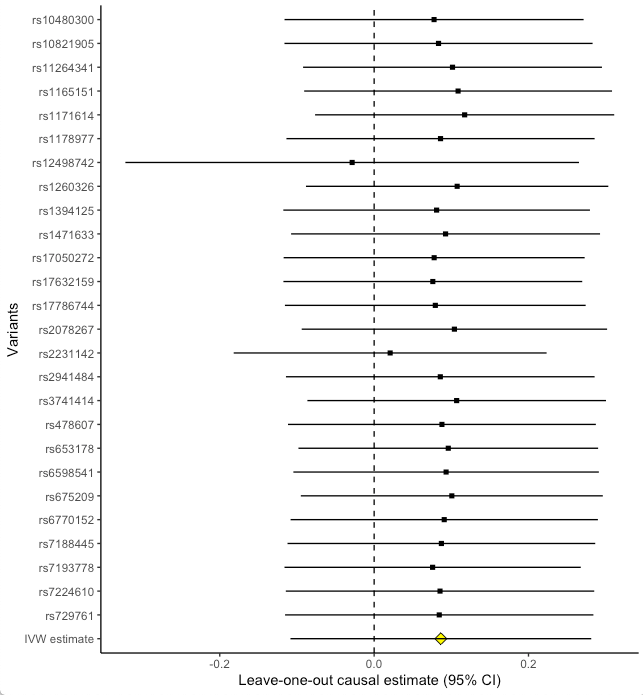


c) Urate - brain tumor d) Urate - gastric cancer


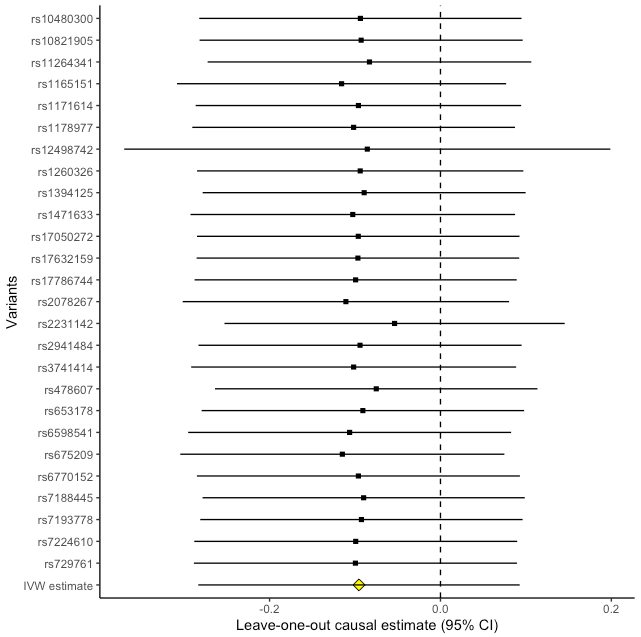

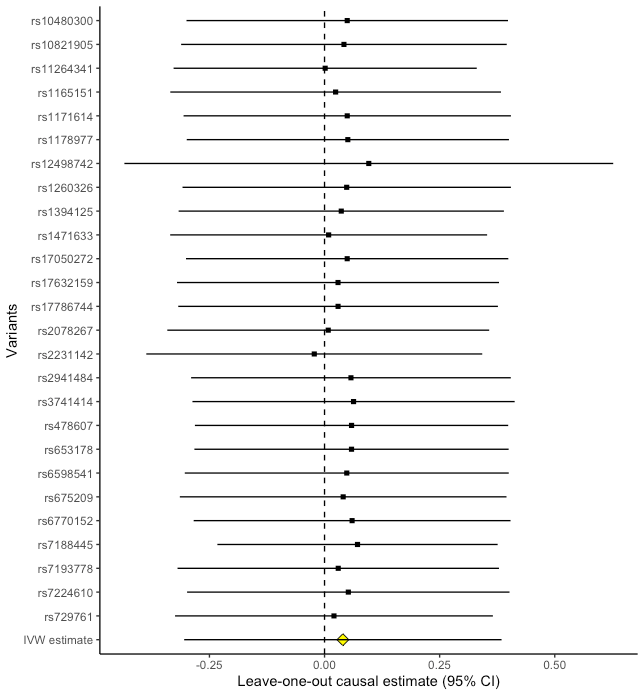


e) Urate - hepatic cancer f) Urate - renal cancer


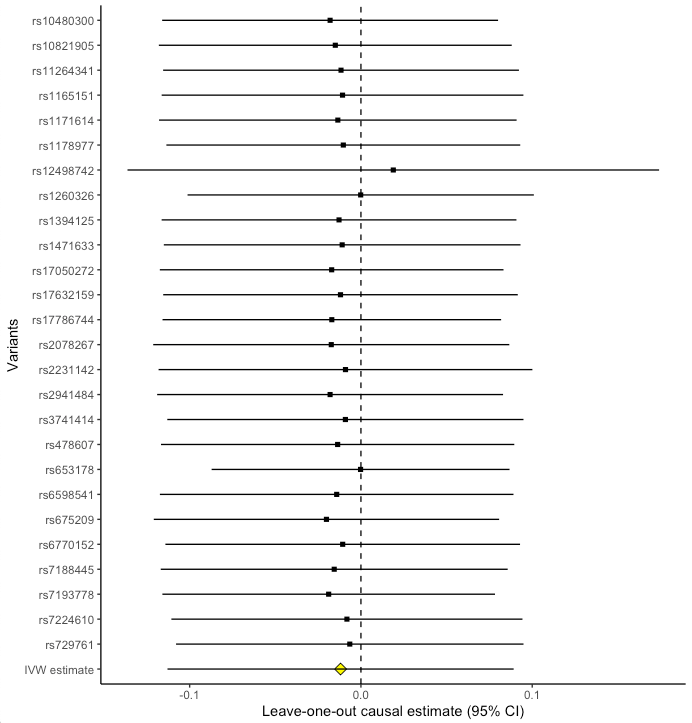

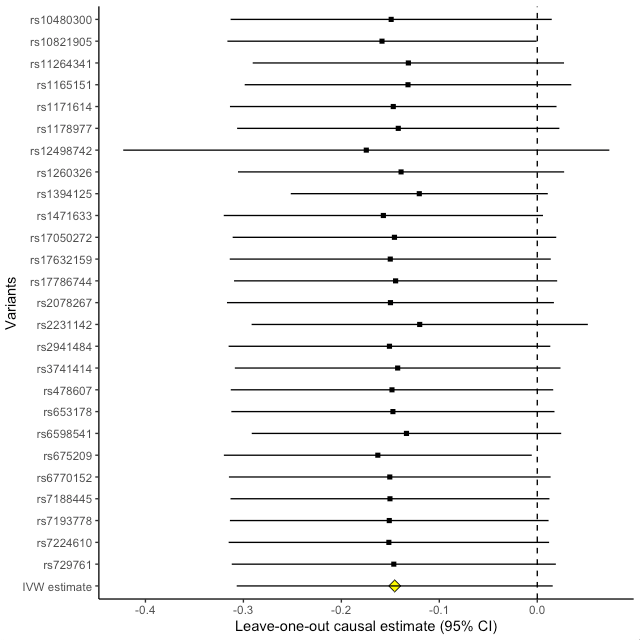


g) Urate - lung cancer h) Urate - lymphatic and hematopoietic cancer


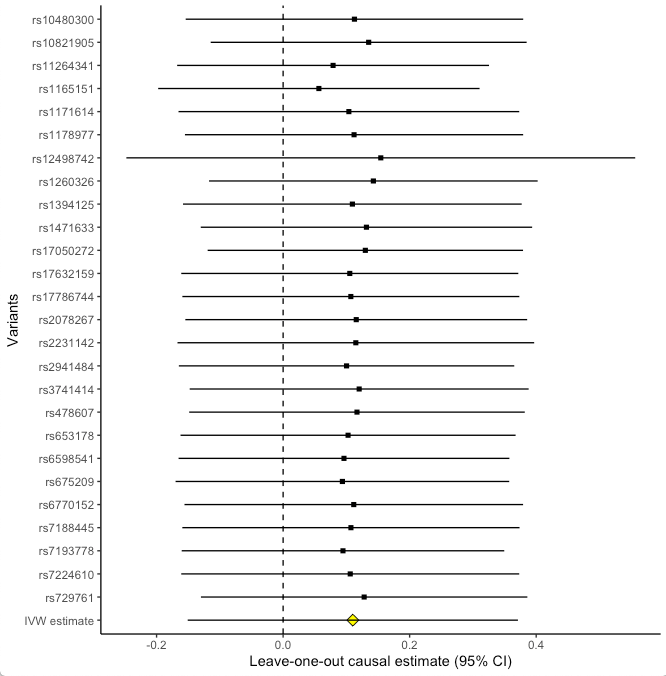

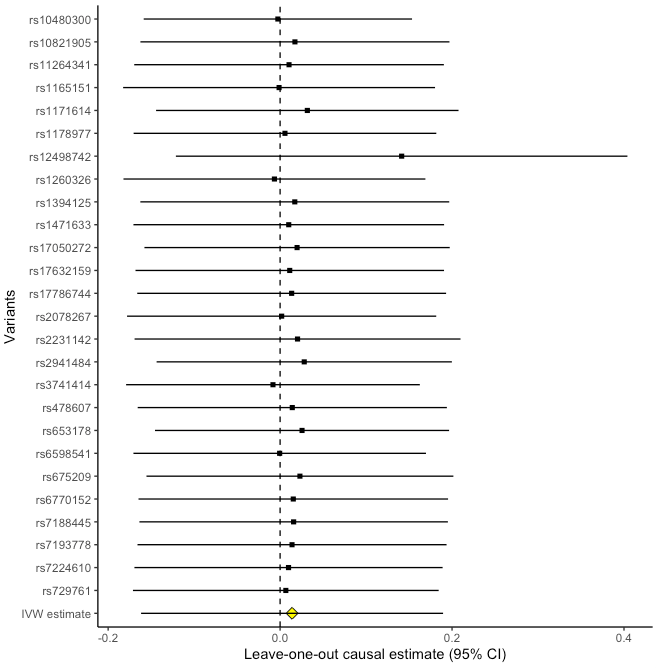


i) Urate - pancreatic cancer j) Urate - skin cancer


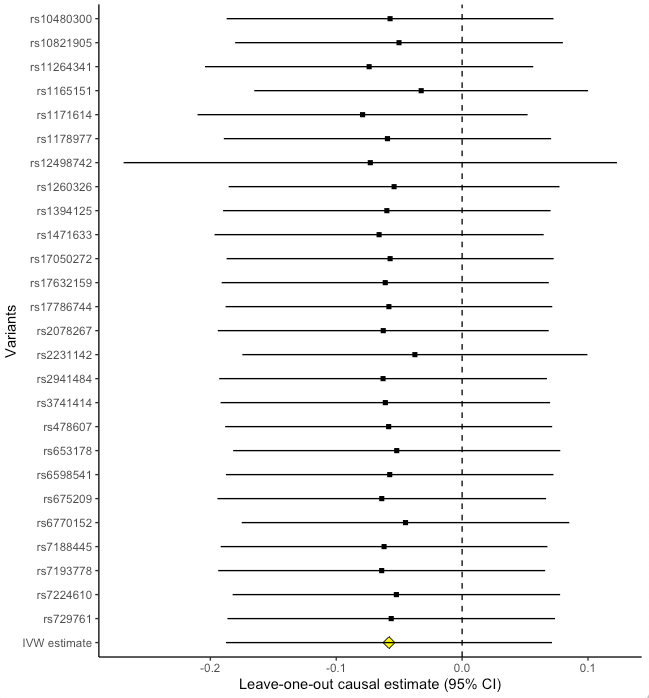

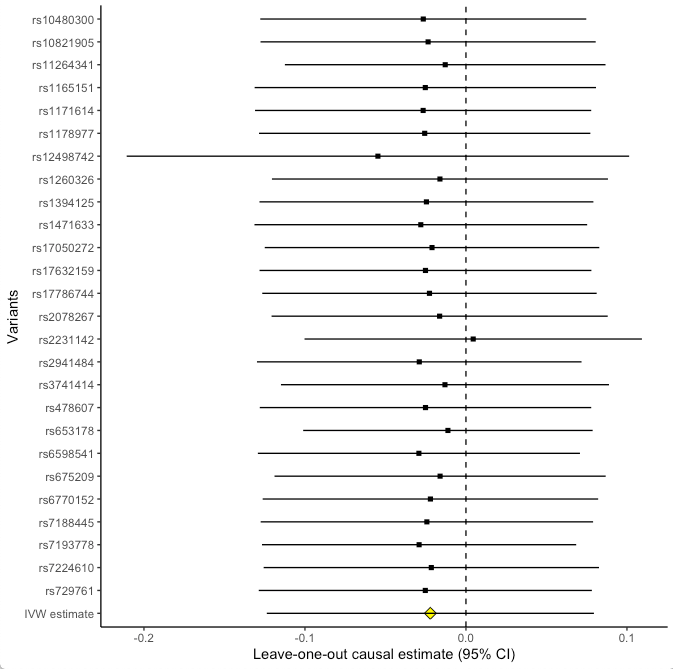


k) Urate – breast cancer l) Urate - gynecological cancers


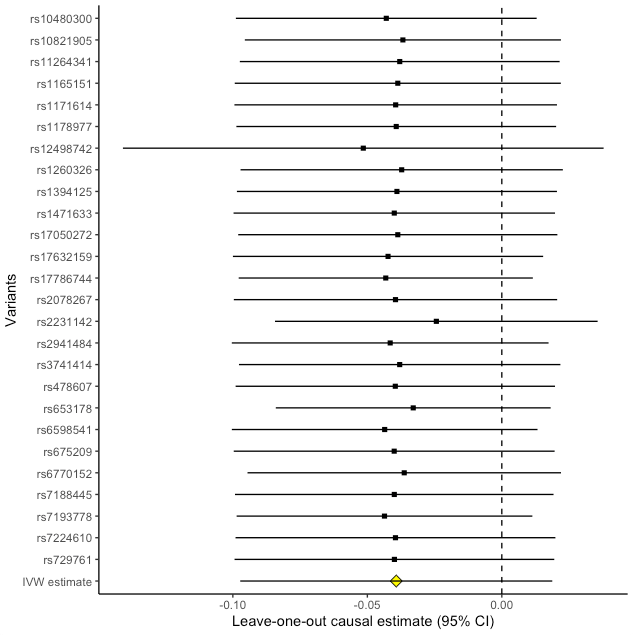

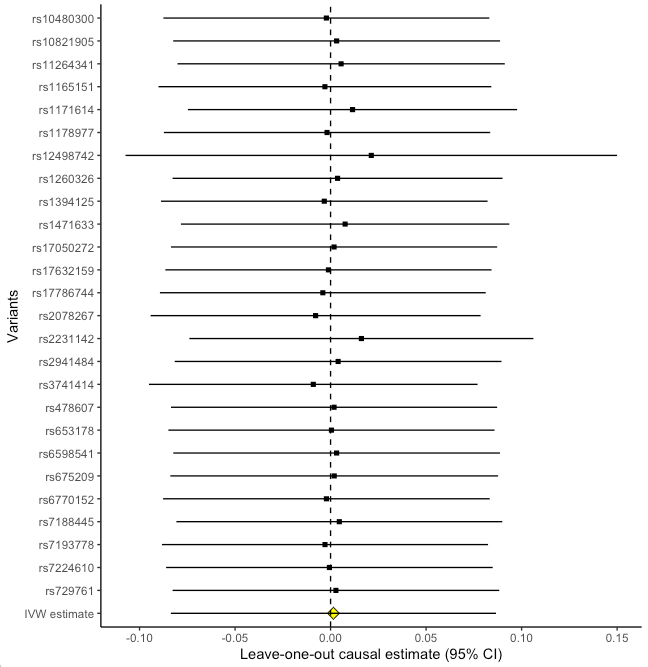


m) Urate - prostate cancer n) Urate - all-cause cancer

**REFERENCES**

1. Teleka S, Hindy G, Drake I, et al. Blood pressure and bladder cancer risk in men by use of survival analysis and in interaction with NAT2 genotype, and by Mendelian randomization analysis. *PloS one*. 2020;15:e0241711.

2. Bycroft C, Freeman C, Petkova D, et al. The UK Biobank resource with deep phenotyping and genomic data. *Nature*. 2018;562:203-9.

3. Köttgen A, Albrecht E, Teumer A, et al. Genome-wide association analyses identify 18 new loci associated with serum urate concentrations. *Nature genetics*. 2013;45:145-54.

4. Palmer TM, Lawlor DA, Harbord RM, et al. Using multiple genetic variants as instrumental variables for modifiable risk factors. *Statistical methods in medical research*. 2012;21:223-42.

5. Teslovich TM, Musunuru K, Smith AV, et al. Biological, clinical and population relevance of 95 loci for blood lipids. *Nature*. 2010;466:707-13.

6. Staley JR, Blackshaw J, Kamat MA, et al. PhenoScanner: a database of human genotype–phenotype associations. *Bioinformatics*. 2016;32:3207-9.
